1  
2  
3  
4  
5  
6  
7  
8  
9  
10  
11  
12  
13  
14  
15  
16  
17  
18  
19

**Title: Sensitive extraction-free SARS-CoV-2 RNA virus detection using a novel RNA preparation method**

**Authors:** Bin Guan<sup>1</sup>, Karen M. Frank<sup>2</sup>, José O. Maldonado<sup>3,4</sup>, Margaret Beach<sup>4</sup>, Eileen Pelayo<sup>4</sup>, Blake M. Warner<sup>4</sup>, Robert B. Hufnagel<sup>1</sup>

**Affiliation and address:**

<sup>1</sup>Ophthalmic Genetics and Visual Function Branch, National Eye Institute,  
<sup>2</sup>Department of Laboratory Medicine, Clinical Center,  
<sup>3</sup>AAV Biology Section, National Institute of Dental and Craniofacial Research,  
<sup>4</sup>Salivary Disorders Unit, National Institute of Dental and Craniofacial Research, National Institutes of Health, Bethesda, MD, 20892, USA.

**Number of text pages, tables and figures:** No. of text pages, 11; tables, 1; figures: 5 (plus 4 supplementary figures)

**Short running head:** Extraction-free SARS-CoV-2 RNA detection

**Grant numbers and sources of support:** Intramural Research Programs of the National Institutes of Health (Clinical Center, NEI, NIDCR)

**Corresponding author:** Robert B. Hufnagel, Ophthalmic Genomics Laboratory, National Eye Institute, National Institutes of Health, 10 Center Drive, Building 10, Rm 10N109, Bethesda, MD, 20892, USA.  
Phone: 301-503-1305. Email: [robert.hufnagel@nih.gov](mailto:robert.hufnagel@nih.gov)

1 **Abstract**

2 Current conventional detection of SARS-CoV-2 involves collection of a patient sample with a  
3 nasopharyngeal swab, storage of the swab during transport in a viral transport medium, extraction of  
4 RNA, and quantitative reverse transcription PCR (RT-qPCR). We developed a simplified and novel  
5 preparation method using a Chelex resin that obviates RNA extraction during viral testing. Direct  
6 detection RT-qPCR and digital-droplet PCR was compared to the current conventional method with RNA  
7 extraction for simulated samples and patient specimens. The heat-treatment in the presence of Chelex  
8 markedly improved detection sensitivity as compared to heat alone, and lack of RNA extraction shortens  
9 the overall diagnostic workflow. Furthermore, the initial sample heating step inactivates SARS-CoV-2  
10 infectivity, thus improving workflow safety. This fast RNA preparation and detection method is versatile for  
11 a variety of samples, safe for testing personnel, and suitable for standard clinical collection and testing on  
12 high throughput platforms.

# 1 Introduction

2 Diagnostic testing for SARS-CoV-2 is crucial to combatting the current COVID-19 pandemic, even as  
3 vaccines are being distributed. The Centers for Disease Control and Prevention (CDC) protocol for  
4 detecting SARS-CoV-2 (COVID-19) involves sample collection, RNA extraction, and one-step real-time  
5 reverse transcription PCR (rRT-PCR or RT-qPCR) (accessed on 6/15/2020:  
6 <https://www.fda.gov/media/134922/download>). Uncontrolled community spread of SARS-CoV-2 has  
7 caused supply shortages for diagnostic tests, including the RNA extraction kits. Supply chain uncertainty  
8 and lack of adequate supplies remain widespread which hinders day-to-day laboratory operations and  
9 impedes efforts to increase testing capacity (survey results published on Nov. 9, 2020 and accessed on  
10 11/12/2020: <https://asm.org/Articles/2020/September/Clinical-Microbiology-Supply-Shortage-Collecti-1>).

11         Recent research aimed at both simplifying current standard testing procedures for SARS-CoV-2  
12 and alleviating RNA extraction kit shortage have shown encouraging results. First, specimens collected  
13 on nasopharyngeal swabs (NP swab) have been eluted into low-ethylenediaminetetraacetic acid (EDTA)  
14 tris buffer (lowTE) and directly used for one-step RT-qPCR without RNA extraction. This results in lower  
15 threshold cycles (Ct values).<sup>1</sup> The lower Ct value suggests that eliminating the RNA extraction step may  
16 increase sensitivity. Secondly, samples collected in viral transport medium (VTM) have been successfully  
17 used for direct RT-qPCR detection after heating.<sup>2-10</sup> Despite these noteworthy results, the Ct values were  
18 4 or more cycles higher than the standard protocol utilizing the RNA extraction step. A lower inherent  
19 detection sensitivity leads to higher false negative rate, which is a particular risk for low viral load  
20 samples.<sup>2, 5, 10</sup> Thirdly, proteinase K and heat has been used for NP and oropharyngeal swabs with 91%  
21 sensitivity, albeit with higher Ct than the conventional RNA extraction method in the RT-qPCR assays.<sup>11</sup>  
22 <sup>12</sup> Recently, saliva samples with RNA extraction have been found to be an effective alternative sample  
23 type to NP swabs.<sup>12-14</sup> Further studies showed that the SalivaDirect® method, employing proteinase K  
24 and heat-treatment, were able to detect 6 genome-copies per µl of SARS-CoV-2 without RNA  
25 extraction.<sup>15</sup> While RNA extraction-free methods are promising, they lack the sensitivity and limit of  
26 detection compared to the current CDC protocol.

1 In this study, we aimed to improve the reported RNA extraction-free protocols to match or exceed  
2 the sensitivity to that of the standard protocol with RNA-extraction using both synthetic and human  
3 samples. We tested a variety of common chemicals that are used in molecular biology laboratories, and  
4 tested different preparation methods to identify reagents and conditions that (i) minimize RNA  
5 degradation, (ii) allow room temperature transport, heat inactivation, and storage of human samples, and  
6 (iii) provide sensitive RNA detection by RT-qPCR or RT-ddPCR. We found that Chelex<sup>®</sup> 100, a chelating  
7 ion exchange resin, preserves essentially all SARS-CoV-2 RNA in the sample and permits direct  
8 detection by both RT-qPCR and RT-ddPCR. We further demonstrated a COVID-19 testing workflow that  
9 obviate the use of a BSL-2 hood and omitting RNA-extraction while preserving the sensitivity of the  
10 standard protocol with RNA-extraction.

## 11 **Results**

### 12 Heating in lowTE buffer along with Chelex detects all virion RNA added

13 Given the promising results for COVID-19 testing obtained by direct elution of dried patient swab to lowTE  
14 (1x low-EDTA TE, 10 mM Tris, 0.1mM EDTA, pH8.0) buffer,<sup>1</sup> and because heating has been shown to  
15 increase testing sensitivity for SARS-CoV-2 when samples stored in viral transport media (VTM) were  
16 used for direct testing without RNA extraction,<sup>2, 5, 10</sup> we set out to test these conditions in a direct dried  
17 swab elution procedure. We simulated the dry swab procedure by desiccating the mixture of inactivated  
18 SARS-CoV-2 virions with known genome copies and 293FT cells using a speedvac centrifuge at room  
19 temperature. After resuspending the virus and cells in lowTE to a concentration of 1,000 genome  
20 copies/ $\mu$ l, we quantified the virus with RT-ddPCR using the N1 and N2 primers and showed that only  
21 ~30% of virions were detected (Figure 1A, dried swab, no heat). Heating increased the detected virus to  
22 ~40% of added virions (Figure 1A, dried swab, heat).

23 As RNases are Mg<sup>2+</sup>-dependent similar to DNases, and Chelex polymers have been used  
24 successfully for DNA preparation for its property of chelating divalent ions,<sup>16</sup> we tested viral RNA isolation  
25 using Chelex. Heating the sample along with 5% Chelex improved virion detection to ~50% (Figure 1A,  
26 dried swab, Heat\_Chelex). We suspected that the desiccation-resuspension process caused viral and

1 cellular RNA degradation. To confirm this, we added virions and 293FT cells directly to lowTE and  
2 measured viral RNA content (Figure 1A, wet swab). Heating the sample in lowTE in the presence of  
3 Chelex led to the detection of ~100% of virions added. The *RPP30* mRNA also had the highest yield in  
4 the presence of Chelex. Heating without Chelex led to more *RPP30* mRNA degradation but better  
5 detection of the SARS-CoV-2 RNA as compared to no heat condition. The N1, N2 primers produced  
6 minimum background as shown in the controls (lowTE and 293FT cells suspended in lowTE) (Figure 1B).

7         The pH of 5% Chelex in water is 10-11.<sup>16</sup> Because alkaline conditions are expected to lead to  
8 rapid RNA hydrolysis, we postulated that Tris pH8.0 in the lowTE buffer was critical for the high detection  
9 rate of SARS-CoV-2 virions in the presence of Chelex. To test this, we measured detectable virion RNA  
10 when samples were prepared in water (Figure 1C). In water, heating with Chelex only detected 20% of  
11 added virions, and 15% of the *RPP30* mRNA detected in the lowTE/Chelex condition. We also simulated  
12 swab stored in MEM  $\alpha$  media, which has a similar formulation to VTM. Heating in MEM  $\alpha$  led to an  
13 undetectable level of viral RNA and *RPP30* mRNA, possibly due to the 1.8 mM  $\text{Ca}^{2+}$  and 0.8 mM  $\text{Mg}^{2+}$   
14 present in the media. Inclusion of Chelex during heating resulted in detection of >55% of viral RNA  
15 (Figure 1C). We found that inclusion of 2.5-5% DMSO in the final ddPCR reaction reduced negative  
16 droplets intensity (Supplementary Figure 1), we also simulated swab stored in the TED10 (90% lowTE +  
17 10% DMSO) buffer, which results in 2.5% DMSO in the ddPCR reaction and thus potentially simplifies  
18 reaction setup. The viral and *RPP30* RNA amounts detected in the TED10 buffer in Chelex was slightly  
19 higher than those in lowTE buffer.

20         The CDC recommends VTM for specimens for viral culture and viral detection, which contains  
21 HBSS 1X with calcium and magnesium, 2% heat-inactivated FBS, Gentamicin and Amphotericin B (CDC  
22 SOP# DSR-052-05 accessed on 11/16/2020, [https://www.cdc.gov/coronavirus/2019-](https://www.cdc.gov/coronavirus/2019-ncov/downloads/Viral-Transport-Medium.pdf)  
23 [ncov/downloads/Viral-Transport-Medium.pdf](https://www.cdc.gov/coronavirus/2019-ncov/downloads/Viral-Transport-Medium.pdf)). The 1X HBSS buffer contains 1.3 mM  $\text{Ca}^{2+}$  and 0.9 mM  
24  $\text{Mg}^{2+}$ , which may lead to viral RNA degradation during heating, similar to MEM  $\alpha$  medium. We tested the  
25 HBSS buffer without  $\text{Ca}^{2+}/\text{Mg}^{2+}$  but supplemented with 2% heat-inactivated FBS, HBSS buffer containing  
26  $\text{Ca}^{2+}/\text{Mg}^{2+}$  and 2% heat-inactivated FBS, the M4 transport medium (HBSS based medium, containing  
27 HEPES, BSA, gelatin, and antibiotics), and PBS in the RNA-extraction free assay (Figure 1D). Heat

1 increased viral detection for calcium/magnesium free media, but not the calcium/magnesium media. Only  
2 ~12% of viral RNA was detected in the HBSS containing  $\text{Ca}^{2+}/\text{Mg}^{2+}$  and 2% heat-inactivated FBS after  
3 heating, in contrast, heating in the presence of Chelex allowed the detection of 84% of virions.

4 In summary, LowTE pH 8.0 and TED10 with Chelex produced the highest amounts of viral RNA  
5 detected as compared to no heat or heating conditions among the buffers tested.

## 6 Buffers allowing successful RT-qPCR without conventional RNA extraction

7 To investigate whether other agents besides Chelex could similarly be used for efficient RNA extraction-  
8 free SARS-CoV-2 detection by protecting against degradation, we tested various buffers for RT-qPCR  
9 without conventional RNA extraction. These buffers included RNA $\text{later}$  (used for sample storage before  
10 RNA extraction), buffer RLT (lysis buffer from the Qiagen RNeasy RNA extraction kit), Urea (used for  
11 RNA extraction<sup>17</sup>), DMSO (used as lysis buffer for DNA extraction<sup>18</sup> and known to inhibit RNases<sup>19</sup>), 1xTE  
12 (10 mM Tris, 1 mM EDTA, pH8.0), 10xTE (20mM Tris, 10 mM EDTA, pH7.5), and MEM  $\alpha$  medium.  
13 Inactivated SARS-CoV-2 and 293FT cells were mixed and added to these buffers above along with  
14 lowTE and heated with or without Chelex (Figure S2A). We diluted the samples in water before RT-qPCR  
15 to avoid suspected inhibition of reverse transcription and PCR, and then compared the Ct values to  
16 calculated Ct values based on Ct of extracted RNA and number of virions present in each sample.

17 Of the chemicals tested, RNA $\text{later}$  and RLT appeared to be incompatible with the RNA-extraction-  
18 free method, as there was either no amplification or the Ct values were much higher than expected for all  
19 four targets (Figure S2A) after 20-fold dilution. Urea, DMSO, TE or MEM  $\alpha$  showed minimum RT-qPCR  
20 inhibition after dilutions. Chelex appears critical to achieve better detection of viral RNA and cellular RNA  
21 in DMSO, 1xTE, lowTE, or MEM  $\alpha$ , with the average Ct cycle difference of N1 & N2 between Chelex and  
22 heat alone as 2.2, 1.8, 1.4, and 13, respectively. This represents improvement of sensitivity by Chelex of  
23 4.5, 3.6, 2.7, and >1000 fold for samples prepared in DMSO, 1xTE, lowTE and MEM  $\alpha$ , respectively. In  
24 summary, viral RNA detection sensitivity in simulated nasopharyngeal swab samples was highest in the  
25 presence of Chelex.

1           Next, we tested saliva samples with known added virion concentrations. Inactivated SARS-CoV-  
2 2 virions were also added to saliva, which were then mixed 1:1 with various buffers as above, to test  
3 whether saliva samples can be subjected to direct RNA detection. Saliva samples without exogenous  
4 chemicals or in DMSO were superior for RT-qPCR detection among the tested conditions (Figure S2A).  
5 Chelex 5% did not improve Ct for saliva, while decreased 3.4 Ct cycles for saliva 1:1 mixed with DMSO  
6 (Figure S2A).

7           We then determined the maximum concentrations of tested chemicals that were tolerated in a  
8 RT-qPCR reaction (Figure S2B). Samples were heat-treated with Chelex and serial dilutions of 2-fold  
9 were used for RT-qPCR. The highest chemical concentrations that did not interfere with RT-qPCR if using  
10 5 µl of undiluted sample in a 20 µl reaction were Urea 0.5 M, DMSO 50%, EDTA 0.5 mM (Figure S2B).  
11 The N1 & N2 Ct values for the undiluted sample in lowTE was the lowest, lower than RNA-extraction  
12 using the same amount of virions, likely reflecting RNA loss during RNA extraction.

13           Together these results indicate that, by obviating the RNA extraction step, the presence of Chelex  
14 in sample buffer increases RNA molecules available for RT-qPCR, as we observed in a variety of buffers  
15 simulating nasopharyngeal and saliva collection conditions. Collecting swabs in lowTE appear to provide  
16 the highest sensitivity under synthetic conditions.

## 17 Limit of detection

18           We attempted to further refine the buffer for this RNA-extraction free method by adjusting DMSO  
19 concentration and combining TE with DMSO. The RT-qPCR data showed that lowTE with heat and  
20 Chelex showed the lowest Ct values for N1 and N2, and combination of TE with DMSO did not improve  
21 the Ct (Figure S3A). Among the saliva samples, the undiluted saliva condition had the lowest Ct for N1  
22 and N2 (Figure S3A), with Ct values ~0.5 cycles above the lowTE sample. Heated saliva samples with or  
23 without Chelex lowered Ct values by more than 2 cycles compared to non-heated samples. We further  
24 found that increasing Chelex levels in DMSO increased detectable viral and cellular RNA (Figure S3B).

25           To improve the limit of detection for RT-qPCR, we optimized the reaction conditions by (i)  
26 including 2.5% DMSO in the final reaction if a sample does not contain DMSO, (ii) reducing the reaction

1 volume to 10  $\mu$ l, (iii) using the NEB-Luna-program II for RT-qPCR, reducing denaturing time from 10  
2 seconds to 5 seconds and annealing/extension time from 40 seconds to 20 seconds (Figure S4). Under  
3 this condition, the Ct for Non-template controls were either undetermined or above 38. When analyzing  
4 the 10-fold serial dilutions of SARS-CoV-2 virions using our new preparation method by RT-qPCR, the  
5 LoD was 200 copies per swab or 1 copy/ $\mu$ l of samples before RT-qPCR (Figure 2A). Using the  
6 conventional RNA extraction method, the LoD was 2,000 genome copies per swab (Figure 2A). The LoD  
7 for saliva samples using the Chelex method was also at 1 copy/ $\mu$ l for all replicates when 50  $\mu$ l whole  
8 unstimulated saliva was added to 25  $\mu$ l of 50% Chelex, compared to the proteinase K method, which was  
9 undetermined for a single 1 copy/ $\mu$ l replicate (Figure 2B).

10 We then used RT-ddPCR to determine whether we could detect a lower virion copy number.  
11 Because we occasionally observed 1 or 2 positive droplets in the no-template control reactions, we  
12 applied 1.8 copies/ $\mu$ l, or 50% higher than the maximum N1/N2 mean of negative controls (Figure 1B and  
13 Figure 2C), for the mean of N1 and N2 as the threshold for being positive for the SARS-CoV-2 N1/N2 RT-  
14 ddPCR assay. RT-ddPCR confirmed the LoD for conventional RNA extraction method to 2,000 virions per  
15 swab and the lowTE-Heat-Chelex method to 200 virions per swab (Figure 2C and Table 1). The RNA  
16 extraction method only detected 30-50% of RNA molecules at the viral loads tested (Table 1).

17 In summary, the lower limit of detection of the Chelex method is 1 copy/ $\mu$ l in NP or saliva under  
18 optimized buffer conditions and it avoids virion loss as observed in RNA extraction protocols.

## 19 Patient samples

20 We then validated our Chelex RNA preparation method using primary patient samples. NP swabs were  
21 collected in M4 (N=14, S01 to S14, Figure 3A) or PBS (N=2, S15 & S16). These samples were tested in  
22 the NIH Clinical Center diagnostic laboratory using conventional CDC RNA extraction and RT-qPCR  
23 method (easyMAG-CL method), then frozen. Three of these samples, S01 to S03, had viral titer above  
24 200 genome copies/ $\mu$ l. Twelve samples had viral titer less than 20 genome copies/ $\mu$ l, including eight  
25 considered indeterminate because only one of N1 or N2 targets was positive. One sample, S14, was  
26 negative.



1 Samples were thawed and mixed with the Chelex resin, heat-inactivated, and subjected to RT-  
2 qPCR using the NEB Luna RT-qPCR kit (Chelex-Luna method). As the easyMAG-CL method enriched  
3 sample 4-fold before RT-qPCR, we expected that Ct values from the Chelex-Luna method would increase  
4 by 2-fold including loss that may occur during RNA extraction (50% detectable viral materials in M4 in the  
5 Chelex-Luna assay; Figure 1D). The Ct values for N1, N2, and RPP30 from clinical laboratory RT-qPCR  
6 and NEB Luna RT-qPCR were comparable when using a common set of purified patient RNA samples  
7 with different viral titer (data not shown). The mean difference of N1 Ct between the two methods was  
8 2.7, excluding four samples (S10, S11, S12, and S16) that did not show a Ct value in the Chelex-Luna  
9 assay.

10 Of the twelve samples with less than 20 genome copies/ $\mu$ l, eight (or 67%) showed as positive in  
11 the N1 Chelex-Luna assay, including two samples (S13 and S15) that showed lower Ct values and  
12 another (S08) with the similar Ct value. The N2 Ct values were higher than N1 and many were higher  
13 than 38, thus were not informative for the low titer samples in the Chelex-Luna assay. Two NP swab  
14 samples stored in the CDC-suggested VTM (HBSS with Calcium & Magnesium, S17 and S18) were  
15 tested side-by-side using the easyMag-CL and Chelex-Luna methods. The N1 & N2 Ct values of both  
16 samples increased 2 and 4, respectively, reflecting likely inhibition by the VTM as observed in the  
17 synthetic samples (Figure 3A).

18 Next, we compared the RNA extraction and Chelex methods using two primary saliva samples  
19 (Saliva01 & 02) and 20 positive saliva samples diluted in negative saliva samples side-by-side (Saliva03  
20 to 22, Figure 3B). The mean Ct differences between the Chelex and RNA extraction methods for N1 and  
21 N2 were 1.6 and 2.6 respectively. Among the six samples with less than 10 genome copies/ $\mu$ l as  
22 determined by the RNA extraction method, five showed as positive and one (Saliva20) was indeterminate  
23 in the Chelex assay (Figure 3B). Thus, the Chelex method demonstrated similar sensitivity as the RNA  
24 extraction method for both primary NP swab and saliva samples.

25 We then tested the optimized Chelex RNA isolation method prospectively by collecting  
26 symptomatic patient NP swabs (n = 7) and saliva-saturated swabs (n = 4) directly into 0.5 ml (NP) or 0.4  
27 ml (saliva) Chelex containing buffer, side-by-side with swabs collected into 3 ml VTM. The Chelex

1 samples were heated and used for NEB Luna RT-qPCR, and the samples in VTM were subjected to RNA  
2 extraction followed by RT-qPCR performed at the clinical laboratory. Because 1/6<sup>th</sup> of buffer in the  
3 collection tube was used in the Chelex method and RNA extraction concentrated sample by 4-fold, the Ct  
4 values in the Chelex method are expected to be 0.6 lower than the RNA extraction method. Sample P1  
5 was found to be negative using both methods, and five of the six NP samples and four of the four saliva  
6 samples had lower N1 and N2 Ct values in the Chelex method as compared to the RNA extraction  
7 method (Figure 3C). The NP sample N1 Ct differences for patients P2 to P7 between these two methods  
8 were -1.9, -2.1, -4.2, 0.8, -3.2, and -6.4, and their N2 Ct differences were -0.3, -5.5, -6.1, -0.7, -3.2, and -  
9 9.7. The saliva samples' N1 Ct differences for patients P4 to P7 between these two methods were -1.1, -  
10 2.1, -2.5, and -1.1, and their N2 Ct differences were -5.6, -3.9, -3.7, and -7.2. Thus, the Chelex method  
11 may offer better sensitivities using the procedure here. In addition, the Chelex method allowed sample  
12 processing without a Biosafety Cabinet hood as the samples were inactivated before tube opening.

### 13 Sample stability at room temperature

14 We then determined whether viral and cellular RNA were stable over time. Samples were stored at room  
15 temperature then heat-treated in the presence of Chelex and assayed at different timepoints as indicated  
16 (Figure 4). Viral RNAs in lowTE or TED10 were relatively stable at room temperature and ~80% of N1 or  
17 N2 RNAs were detected on day 5 (Figure 4A). Viral RNAs were less stable in MEM  $\alpha$  medium as > 80%  
18 were degraded after 3 days (Figure 4A). The cellular RNA was less stable than viral RNA in the similar  
19 conditions (Figure 4A). We then determined the RNA stability at room temperature after heat-treatment  
20 with Chelex (Figure 4B). Heat-treatment stabilized both viral and cellular RNA, and >80% viral RNAs  
21 and >60% cellular RNA were detected on day 5 (Figure 4B).

22 A similar stability experiment was performed for virions prepared in saliva samples. The viral  
23 RNAs were stable in saliva before heat-treatment, as a higher amount of viral RNAs were detected after  
24 storage at room temperature, possibly because interfering agents in saliva degrade during storage  
25 (Figure 5A). However, the viral RNA stability decreased markedly after heat treatment (Figure 5B).

26

## 1 Discussion

2 Our novel preparation approach using Chelex polymer increased RNA yield available for RT-  
3 qPCR and RT-ddPCR detection compared to the conventional method using the simulated samples with  
4 the ATCC SARS-CoV-2 virions. When using stored patient samples, RNA extraction provided higher  
5 sensitivity (Figure 3A, B). This is likely due to the enrichment arising from the lower volume of RNA eluate  
6 as compared to the input sample volume. The lower sensitivity of the Chelex method seen in Figure 3A  
7 could be also due to RNA loss during the freeze-thaw cycle. When the samples were tested side-by-side  
8 (Figure 3B), the sensitivities of the Chelex method and RNA extraction method are comparable. When  
9 patient samples were collected in VTM (S17 & S18 in Figure 3A), the N1 and N2 Ct values increased 2  
10 and 4, respectively, suggesting that the Chelex method on VTM-collected samples may result in lower  
11 sensitivity for some low viral load samples. Further, we found that N1 and N2 responded differently  
12 toward components in the VTM as the N1 Ct increased while N2 Ct decreased after 1:2 dilution (S19 &  
13 S20 in Figure 3A). Our results in Figure 3C showed that collecting the swab directly in Chelex-TED  
14 (TE+DMSO) buffers followed by heating provided the best sensitivity for SARS-CoV-2 detection. The  
15 higher LoD associated with conventional RNA extraction method was due to dilution in the VTM and loss  
16 of RNA during RNA extraction as shown in Table 1. In addition, viral RNA may be degraded faster when  
17 storing in the calcium/magnesium containing VTM, as suggested by data presented in Figure 4A. As  
18 such, we recommend primary sample collection for this RNA isolation method in either TED or lowTE  
19 buffer, which has similar or better detection performance as RNA extraction methods for primary samples  
20 collected in VTM.

21 We also demonstrate that the Chelex method allows for highly-reproducible detection of 1  
22 genome copy/ $\mu$ l of the SARS-CoV-2 virions, a 6-15-fold improvement in detection sensitivity.<sup>15, 20</sup> One  
23 explanation for this improvement is that the Chelex resin chelates the divalent ions necessary for Rnase  
24 activities, and the resin may be able to non-specifically remove inhibitors to reverse-transcription and/or  
25 PCR. In addition, un-processed samples may lead to more RNA degradation during sample collection  
26 and storage as compared to being stored in the presence of Chelex. We further identified conditions that  
27 allow sensitive detection of SARS-CoV-2 in saliva. The potential benefits of saliva testing include lower

1 cost (no swab), reduced variability, and improved patient acceptance over traditional NP swab.<sup>14, 21</sup> Thus,  
2 the Chelex method may provide a more sensitive point-of-care method for RNA diagnostics by reducing  
3 false negative results.

4         There will be a continued need for SARS-CoV-2 detection during and after the current vaccination  
5 period. The sheer volume of preprint and publications in a short period of time illustrates the urgent need  
6 and hope to increase testing capacity employing the RNA-extraction free approach. The utility of this RNA  
7 isolation method for both NP and saliva samples would increase the number of people tested in the same  
8 timeframe as the current method. In addition to improved sensitivity, this method offers a number of  
9 additional advantages compared to the current gold standard clinical laboratory testing, including  
10 improved cost, reduced sample processing time and complexity, and enhanced workflow safety. The cost  
11 of CDC-recommended VTM collection tube is ~\$1.70 per tube, and RNA extraction may cost > \$6 per  
12 sample. We estimate the total cost of Chelex, lowTE, DMSO, and the collection tube is <\$1 per sample.  
13 Thus, the Chelex method will save cost and reduce supply chain burden by eliminating the need for RNA  
14 extraction and VTM. The novel RNA preparation method, amenable for high-throughput processing, is  
15 expected to shorten diagnostic testing time by omitting the RNA extraction step and omitting the chemical  
16 disinfection of patient samples. This method utilizes a heat-inactivation step that minimizes viral RNA  
17 loss, obviates the need for a biological safety cabinet, and eliminates exposure of laboratory personnel to  
18 live virus. Therefore, we fully expect that this method will facilitate broader availability and testing capacity  
19 for not only, COVID-19, but also for other infectious pathogens. Because of the observed stability of  
20 SARS-CoV-2 RNA in collected samples at room temperature, this method should also improve access to  
21 COVID-19 testing in resource scarce regions of the world, by improving RNA stability, reducing cost of  
22 collection kits and diagnostic reagents, and eliminating the requirement of refrigeration, biosafety cabinet,  
23 and storage of RNA extraction kits.

24         Because the Chelex method also allowed cellular RNA detection, we expect that the method  
25 could find wide use in both clinical and research laboratories. DNA present in the solution is not expected  
26 to interfere with many applications because RT-qPCR can be performed using exon-spanning primers  
27 and polyA selection is often an integrated step in RNAseq. The DNA present may be also used as a

1 normalization control since the DNA content reflects the cell number when two cell populations have  
2 similar percentages of cells in the G2/M phases. This helps alleviate the concerns of choosing a proper  
3 house-keeping gene during RNA expression analysis.<sup>22</sup> If DNA needs to be removed before downstream  
4 application, Dnase I treatment may be performed using commercially available Dnase I kits. The new  
5 RNA preparation method could also be used together with other RNA detection method such as rolling  
6 circle amplification, loop-mediated isothermal amplification or SHERLOCK.<sup>23-25</sup>

7           One limitation of the current study was the low-level contamination observed in the RT-ddPCR  
8 assay, where one or two positive droplets were observed in the no-template control reactions. The  
9 contamination could result from either viral RNA or PCR amplicon present in the research laboratory. Due  
10 to the background contamination, we used 1.8 copies/ $\mu$ l as the low limit of detection for the SARS-CoV-2  
11 N1/N2 RT-ddPCR assay. According to the FDA Emergency Use Authorization (EUA) by the manufacturer  
12 Bio-Rad, the low limit of detection in the 1-well RT-ddPCR assay system is 2 positive droplets and no  
13 positive droplets observed in no-template controls. Thus the low limit of detection in a RT-ddPCR assay  
14 could reach 0.1 copy/ $\mu$ l if performing in a clean room.

15           In summary, we robustly demonstrate improvements in COVID-19 viral testing workflow using  
16 synthetic and real-world samples employing the Chelex-based extraction-free workflow. This methodology  
17 has the clear benefit of dramatic improvements in sensitivity, cost, and time savings for clinical laboratory  
18 testing. Additionally, this method exhibits improved safety characteristics including obviating the need for  
19 the use of a biological safety cabinet and harsh disinfection chemicals prior to testing. Finally, this method  
20 is easily adapted to both clinical and research laboratories and could be standard of care for nucleic acid  
21 testing and transport in the near future.

22

## 23 **Online Methods**

24 Human samples

1 Samples were collected from healthy volunteers and subjects who provided informed consent to National  
2 Institutes of Health (NIH) Institutional Review Board (IRB)-approved protocols (20-D-0094,  
3 NCT04348240; 20-CC-0128, NCT04424446) at the NIH Clinical Center.

#### 4 Sample collection

5 We used four types of samples for assay development and validation: (i) simulated samples containing  
6 the heat-inactivated SARS-CoV-2 virions obtained from ATCC (VR-1986HK, concentration measured by  
7 ddPCR at ATCC); (ii) positive patient saliva samples diluted into negative saliva samples; (iii) historical  
8 patient samples including nasopharyngeal swab and whole unstimulated saliva; and (iv) prospective  
9 paired nasopharyngeal and saliva samples swabs. The paired NP and saliva samples were collected at  
10 the NIH Symptomatic Testing Facility. Briefly, a FLOQswab® (COPAN) was inserted into the nares and  
11 advanced posteriorly to the nasopharynx as previously described.<sup>26</sup> Swabs were then inserted into VTM.  
12 Subjects were asked to expectorate into a sterile 50 mL conical vial every 30 seconds for 3-5 minutes, or  
13 until ~3 mL of saliva was collected. A FLOQswab® was inserted into the saliva and immediately  
14 transferred into VTM. Samples were placed on ice and shipped immediately to the NIH Clinical Center  
15 Clinical Laboratory for standard CDC testing. In parallel, NP samples were placed in 0.5 ml 10% Chelex  
16 in TED10 buffer (90% lowTE and 10% DMSO), and swabs with saliva were placed in 0.4 ml Chelex saliva  
17 buffer. The 0.4 ml Chelex saliva buffer was made by mixing 0.2 ml of 50% Chelex in TED99 and 0.2 ml of  
18 lowTE. TED99 was 10mM Tris pH8.0, 0.1mM EDTA and 99% DMSO, which was made by mixing 100 µl  
19 of 1 M Tris pH8.0, 2 µl of 0.5 M EDTA, and 9.9 ml of DMSO. These patient samples with Chelex in 15-ml  
20 tubes were heat-inactivated in a thermomixer for 10 min at 98 °C before testing.

#### 21 Clinical laboratory CDC SARS-CoV-2 Assay

22 The conventional RNA-extraction RT-qPCR method following CDC guideline has been reported, and  
23 herein referred as easyMAG-CL (clinical laboratory) assay.<sup>21</sup> Briefly, nucleic acid from individual  
24 specimens was extracted from 200 µL of Saliva/NPspecimens using the NucliSENS® easyMAG® platform  
25 (bioMérieux, Marcy l'Etoile, France) with an elution volume of 50 µL. 5 µl RNA was then used for RT-  
26 qPCR in 20 µl reaction volume. PCR was performed on the ABI 7500 Fast Real-Time PCR System

1 (Thermo Fisher Scientific, Waltham, MA). The assay utilized primer/probe sets for nucleocapsid protein,  
2 2019-nCoV\_N1 and 2019-nCoV\_N2, and the human RNase P (*RPP30* gene, also referred as *RP* gene in  
3 the CDC protocol) as an internal control to ensure that extraction and amplification was adequate as  
4 described. Cycle threshold (Ct) values were recorded for N1, N2 and RNase P for each sample. Samples  
5 were considered positive for SARS-CoV-2 when both N1 and N2 targets were detected with Ct count <40.  
6 The positive signal for N1 or N2 alone was defined as an indeterminate result.

## 7 Chemicals, buffers, and cells

8 Chelex® 100 Resin (hereafter “Chelex”; cat# 142-1253, molecular biology grade) was obtained from Bio-  
9 Rad. Molecular biology grade water (cat# 351-029-101), TE pH 8.0 (cat# 351-011-131), 1M Tris-HCl  
10 pH7.5 (cat# 351-006-101), HBSS with Ca<sup>2+</sup>/Mg<sup>2+</sup> (cat# 114-061-101) were from Quality Biological  
11 (Gaithersburg, MD). The low-EDTA TE or lowTE buffer (10 mM Tris, pH8.0, 0.1 mM EDTA, cat# 12090-  
12 015), Urea (cat# 15505-050), RNAlater (cat# AM7024), MEM medium (cat# 12571-063), HBSS without  
13 Ca<sup>2+</sup>/Mg<sup>2+</sup> (cat# 14175-095), M4 (cat# R12550), heat-inactivated FBS, 293FT cells were procured from  
14 Thermo Fisher Scientific. Dimethyl sulfoxide (DMSO, cat# D2650-100ML) was from Sigma. 1M Tris-HCl  
15 pH8.0 (cat#221-232) and 0.5M EDTA (cat#221-057) were from Crystalgen (Commack, NY). PBS (cat#  
16 RGF-3190, pH7.2) was from KD Medical (Columbia, MD). TED10 buffer was 90% lowTE and 10% DMSO  
17 (volume to volume).

18 Chelex was first prepared in H<sub>2</sub>O, lowTE, or TED99 at 50% (50 grams/100 ml total volume, or  
19 500 milligrams Chelex to 550 µl H<sub>2</sub>O). The 50% Chelex was then added in 1/10 volume to samples to  
20 obtain 5% Chelex in a PCR strip with a wide-bore tip. The samples were vortexed briefly then heated in a  
21 PCR cycler for 5 min at 98 °C, followed by spinning at 1,000 to 2,000xg for 2 mins in a swing-rotor. The  
22 supernatant was then used for RT-qPCR or -ddPCR.

23 For simulated samples involving the ATCC virions, the RNeasy mini kit (Qiagen) was used to  
24 extract RNA from virion and cell mixture of less than 10 µl that contained the expected amounts of virions.  
25 The RNeasy Protect Saliva Mini Kit (Qiagen) was used for RNA extraction from ATCC virion-simulated  
26 saliva samples.

## 1 Primers, RT-qPCR and RT-ddPCR

2 The primer and probe sequences used for detecting SARS-CoV-2 and human *RPP30* targets in the RT-  
3 ddPCR and NEB Luna RT-qPCR were identical to the easyMAG-CL assay above. The *RPP30* (or RP)  
4 primers and probe in the CDC protocol, whose sequences are RPP30F AGATTTGGACCTGCGAGCG,  
5 RPP30R GAGCGGCTGTCTCCACAAGT, RPP30Hex TTCTGACCTGAAGGCTCTGCGCG, amplify the  
6 DNA sequence located in the exon 1 of the *RPP30* gene, thus are expected to amplify both cDNA and  
7 genomic DNA contents. An additional *RPP30* primer specific for *RPP30* cDNA was designed to span the  
8 exon 1 and exon 2, RPP30cR GCAACAACCTGAATAGCCAagGT, where the lower case “ag” denotes the  
9 exon junction. RPP30cR was used for RT-qPCR or -ddPCR together with RPP30F and RPP30Hex. The  
10 primer and probe sequences for an ultra-conserved region in chromosome 5 are: chr5UC-F  
11 ATTTATGACCAGCCACAGCC, chr5UC-R CCATCAGGGACTTGGTTTCA, chr5UC-Hex  
12 CAACTCCAGCAGCTGCACACCGC. Primers and probes were ordered from Eurofins Genomics or  
13 IDTDNA.

14 The Luna Universal Probe One-Step RT-qPCR Kit (#E3006X, NEB) was used for RT-qPCR with  
15 the following cycling conditions using a QuantStudio 3 real-time PCR system (ThermoFisher Scientific):  
16 NEB-Luna-Program I: 55°C for 10 min, 95°C for 1 min, and 45 cycles of 95 °C for 10 sec and 60 °C for 40  
17 sec or NEB-Luna-Program II: 55°C for 10 min, 95°C for 1 min, and 45 cycles of 95 °C for 5 sec and 60 °C  
18 for 20 sec. Ct (Crossing threshold) values for N1 & N2 (viral targets) were set at 0.1  $\Delta$ Rn, Ct values for  
19 cRPP30 (specific for *RPP30* cDNA) and RPP30 (targets both genomic DNA and cDNA) were at 0.02  
20  $\Delta$ Rn. The N1 and N2 Ct of less than 38 were considered positive in the NEB Luna RT-qPCR assay.

21 The 1-Step RT-ddPCR Advanced Kit for Probes (#186-4021, Bio-Rad) was used for RT-ddPCR  
22 using the QX200 Droplet Digital PCR System (Bio-Rad). The cycling condition for RT-ddPCR was: 50°C  
23 for 60 min, 95°C for 10 min, and 40 cycles of 94°C for 10 sec and 55°C for 60 sec, followed by 98°C for  
24 10 min, 4°C for 30 min then hold at 4°C. If DMSO was not present in the sample, DMSO was added to  
25 2.5% in the RT-qPCR or -ddPCR reaction, unless specified otherwise.

26



1 **Acknowledgments**

2 This work was supported by the Intramural Research Programs of the National Institutes of Health  
3 (Clinical Center, NEI, NIDCR). The content of this publication does not necessarily reflect the views or  
4 policies of the Department of Health and Human Services, nor does mention of trade names, commercial  
5 products, or organizations imply endorsement by the U.S. Government. We would like to acknowledge  
6 staff in the National Institutes of Health Department of Laboratory Medicine, Occupational Medical  
7 Services COVID-19 Testing Facility, and the Division of Fire and Rescue Services.

8

9 **Author contributions**

10 B.G., K.M.F., B.M.W. and R.B.H. designed experiments and wrote the manuscript. K.M.F., J.O.M., M.B.,  
11 E.P., and B.M.W. collected patient samples. All authors contributed to the manuscript editing.

12

13 **Competing interests**

14 NEI (B.G. and R.B.H.) filed an invention disclosure. NEI has protected the intellectual property around this  
15 technology which is available for licensing and co-development. Please contact  
16 [neitechtransfer@nei.nih.gov](mailto:neitechtransfer@nei.nih.gov) for more information.

17

## 1 References

- 2 1. Srivatsan, S. et al. Preliminary support for a “dry swab, extraction free” protocol for SARS-CoV-2  
3 testing via RT-qPCR. *bioRxiv*, 2020.2004.2022.056283 (2020).
- 4 2. Beltrán-Pavez, C. et al. SARS-CoV-2 detection from nasopharyngeal swab samples without RNA  
5 extraction. *bioRxiv*, 2020.2003.2028.013508 (2020).
- 6 3. Grant, P.R., Turner, M.A., Shin, G.Y., Nastouli, E. & Levett, L.J. Extraction-free COVID-19 (SARS-  
7 CoV-2) diagnosis by RT-PCR to increase capacity for national testing programmes during a  
8 pandemic. *bioRxiv* (2020).
- 9 4. Lubke, N. et al. Extraction-free SARS-CoV-2 detection by rapid RT-qPCR universal for all primary  
10 respiratory materials. *J Clin Virol* **130**, 104579 (2020).
- 11 5. Bruce, E.A. et al. Direct RT-qPCR detection of SARS-CoV-2 RNA from patient nasopharyngeal  
12 swabs without an RNA extraction step. *PLoS Biol* **18**, e3000896 (2020).
- 13 6. Hasan, M.R. et al. Detection of SARS-CoV-2 RNA by direct RT-qPCR on nasopharyngeal  
14 specimens without extraction of viral RNA. *PLoS One* **15**, e0236564 (2020).
- 15 7. Alcoba-Florez, J. et al. Fast SARS-CoV-2 detection by RT-qPCR in preheated nasopharyngeal swab  
16 samples. *Int J Infect Dis* **97**, 66-68 (2020).
- 17 8. Merindol, N. et al. SARS-CoV-2 detection by direct rRT-PCR without RNA extraction. *J Clin Virol*  
18 **128**, 104423 (2020).
- 19 9. Smyrlaki, I. et al. Massive and rapid COVID-19 testing is feasible by extraction-free SARS-CoV-2  
20 RT-PCR. *Nat Commun* **11**, 4812 (2020).
- 21 10. Fomsgaard, A.S. & Rosenstjerne, M.W. An alternative workflow for molecular detection of SARS-  
22 CoV-2 - escape from the NA extraction kit-shortage, Copenhagen, Denmark, March 2020. *Euro*  
23 *Surveill* **25** (2020).

- 1 11. Mallmann, L. et al. Pre-treatment of the clinical sample with Proteinase K allows detection of  
2 SARS-CoV-2 in the absence of RNA extraction. *bioRxiv* (2020).
- 3 12. Chu, A.W. et al. Evaluation of simple nucleic acid extraction methods for the detection of SARS-  
4 CoV-2 in nasopharyngeal and saliva specimens during global shortage of extraction kits. *J Clin*  
5 *Viro* **129**, 104519 (2020).
- 6 13. Sakanashi, D. et al. Comparative evaluation of nasopharyngeal swab and saliva specimens for  
7 the molecular detection of SARS-CoV-2 RNA in Japanese patients with COVID-19. *J Infect*  
8 *Chemother* (2020).
- 9 14. Wyllie, A.L. et al. Saliva or Nasopharyngeal Swab Specimens for Detection of SARS-CoV-2. *N Engl*  
10 *J Med* **383**, 1283-1286 (2020).
- 11 15. Vogels, C.B.F. et al. SalivaDirect: A simplified and flexible platform to enhance SARS-CoV-2  
12 testing capacity. *medRxiv* (2020).
- 13 16. Walsh, P.S., Metzger, D.A. & Higuchi, R. Chelex 100 as a medium for simple extraction of DNA for  
14 PCR-based typing from forensic material. *Biotechniques* **10**, 506-513 (1991).
- 15 17. Almarza, J., Morales, S., Rincon, L. & Brito, F. Urea as the only inactivator of RNase for extraction  
16 of total RNA from plant and animal tissues. *Anal Biochem* **358**, 143-145 (2006).
- 17 18. Campo, E.M.d., Hoyo, A.d., Casano, L.M., Martínez-Alberola, F. & Barreno, E. A rapid and cost-  
18 efficient DMSO-based method for isolating DNA from cultured lichen photobionts. *Taxon* **59**,  
19 588-591 (2010).
- 20 19. Moreno, J.M., Sinisterra, J.V. & Ballesteros, A. Influence of Organic Aqueous-Media in the Rnase  
21 Activity of Spleen Phosphodiesterase. *J Mol Catal* **62**, 341-351 (1990).
- 22 20. Mancini, F. et al. Laboratory management for SARS-CoV-2 detection: a user-friendly  
23 combination of the heat treatment approach and rt-Real-time PCR testing. *Emerg Microbes*  
24 *Infect* **9**, 1393-1396 (2020).

- 1 21. Barat, B. et al. Pooled Saliva Specimens for SARS-CoV-2 Testing. *J Clin Microbiol* (2020).
- 2 22. Panina, Y., Germond, A., Masui, S. & Watanabe, T.M. Validation of Common Housekeeping  
3 Genes as Reference for qPCR Gene Expression Analysis During iPS Reprogramming Process. *Sci*  
4 *Rep* **8**, 8716 (2018).
- 5 23. Kellner, M.J., Koob, J.G., Gootenberg, J.S., Abudayyeh, O.O. & Zhang, F. SHERLOCK: nucleic acid  
6 detection with CRISPR nucleases. *Nat Protoc* **14**, 2986-3012 (2019).
- 7 24. Park, G.S. et al. Development of Reverse Transcription Loop-Mediated Isothermal Amplification  
8 Assays Targeting Severe Acute Respiratory Syndrome Coronavirus 2 (SARS-CoV-2). *J Mol Diagn*  
9 **22**, 729-735 (2020).
- 10 25. Takahashi, H. et al. RNase H-assisted RNA-primed rolling circle amplification for targeted RNA  
11 sequence detection. *Sci Rep* **8**, 7770 (2018).
- 12 26. Huang, N. et al. Integrated Single-Cell Atlases Reveal an Oral SARS-CoV-2 Infection and  
13 Transmission Axis. *medRxiv* (2020).

14

1 **Table**

2 Table 1. Limit of Detection comparing conventional RNA extraction and new preparation method

| "Swab"<br>viral load<br>(genome<br>copies) | RNA-extraction                                        |                                                  |                         | lowTE_Heat_Chelex                                     |                                                  |                         |
|--------------------------------------------|-------------------------------------------------------|--------------------------------------------------|-------------------------|-------------------------------------------------------|--------------------------------------------------|-------------------------|
|                                            | Theoretical<br>virus<br>concentration*<br>(copies/μl) | Mean of<br>N1/N2<br>concentration<br>(copies/μl) | Percentage<br>detected  | Theoretical<br>virus<br>concentration*<br>(copies/μl) | Mean of<br>N1/N2<br>concentration<br>(copies/μl) | Percentage<br>detected  |
| <b>200k</b>                                | 266.7                                                 | 86.8                                             | 33%                     | 1000                                                  | 976                                              | 98%                     |
| <b>20k</b>                                 | 26.7                                                  | 12.0                                             | 45%                     | 100                                                   | 106                                              | 106%                    |
| <b>2k</b>                                  | 2.7                                                   | 2.2                                              | Detectable <sup>#</sup> | 10                                                    | 13.4                                             | 134%                    |
| <b>200</b>                                 | 0.3                                                   | 0.5                                              | ND <sup>#</sup>         | 1                                                     | 2.1                                              | Detectable <sup>#</sup> |

3 \*: Virus concentration in samples used for RT-ddPCR if there is no loss during sample processing.

4 #: ND, not detectable. The low limit of quantification in the 1-well RT-ddPCR assay is 4 copies/μl of a  
 5 molecule. The means of N1 and N2 copy numbers for the control samples without virions added were  
 6 less than 1.2 copies/μl, thus, we applied 1.8 copies/μl as the low limit of detection for the SARS-CoV-2  
 7 N1/N2 RT-ddPCR assay.

1 **Figure Legends**

2 **Figure 1.** RT-ddPCR assays for simulated dry- and wet-swab using RNA-extraction free  
3 methods for SARS-CoV-2 detection. **(A)** 200,000 SARS-CoV-2 virions and 20,000 293FT cells  
4 were dried at room temperature in a speedvac and then resuspended in 200  $\mu$ l lowTE buffer to mimic the  
5 dry swab. The same amount of virions and 293FT cells directly added to 200  $\mu$ l lowTE buffer was used to  
6 mimic the wet swab. The samples expected to have 1000 virion genome copies/ $\mu$ l were then used directly  
7 for RT-ddPCR (No Heat), heated at 98  $^{\circ}$ C for 5 min (Heat), or heated with 5% Chelex (Heat\_Chelex). The  
8 RT-ddPCR reactions were carried out in one well for N1 and cRPP30 and another well for N2 and  
9 RPP30. **(B)** Negative controls and virion samples prepared as wet swab. The mean genome copies/ $\mu$ l of  
10 N1 & N2 were less than 1.2 in negative controls without virions added. N1 & N2 target SARS-CoV-2.  
11 cRPP30 is specific for *RPP30* cDNA, and RPP30 targets both genomic DNA and cDNA. Copies/ $\mu$ l refers  
12 to concentration in the samples used for RT-ddPCR. The error bars represent Poisson 95% confidence  
13 intervals. Dashed line indicates the threshold for the low detection limit of 1.8 copies/ $\mu$ l of SARS-CoV-2  
14 virions. **(C)** Virions of 1000 genome copies/ $\mu$ l and 100 293FT cells/ $\mu$ l were prepared in lowTE, H<sub>2</sub>O, MEM  
15 alpha, or TED10, treated and assayed by RT-ddPCR as in (A). **(D)** Virions of 1000 genome copies/ $\mu$ l and  
16 100 293FT cells/ $\mu$ l were prepared in HBSS with or without Ca<sup>2+</sup> & Mg<sup>2+</sup> supplemented with 2% FBS, M4,  
17 or PBS, treated and assayed by RT-ddPCR in for N1, N2, cRPP30 and chr5UC, a genomic DNA region  
18 on chromosome 5.

19 **Figure 2.** The limit of detection of SARS-CoV-2 using RT-qPCR or -ddPCR. **(A)** RT-qPCR  
20 comparing Chelex-RNA and conventional RNA extraction. RNA refers to RNA prepared by simulating  
21 conventional method with RNA-extraction: a swab with 200,000 to 200 genome copies of SARS-CoV-2  
22 virions was added to 3 ml of VTM, of which 200  $\mu$ l were used for RNA extraction, and RNA was eluted in  
23 50  $\mu$ l H<sub>2</sub>O. LowTE refers to simulating a swab with 200,000 to 200 genome copies of virions eluted in 200  
24  $\mu$ l lowTE, and then heated in the presence of 5% Chelex. **(B)** RT-qPCR comparing Chelex and  
25 Proteinase K methods for saliva samples. 1000 to 1 genome copies/ $\mu$ l of SARS-CoV-2 virions were  
26 prepared in saliva samples and subjected to the Chelex or Proteinase K methods and RT-qPCR. The  
27 NEB Luna RT-qPCR kit and NEB-Luna-Program II was used with 2.5  $\mu$ l samples in 10  $\mu$ l reaction volume.

1 Samples with undetermined Ct values were plotted as Ct 40. **(C)** The limit of detection of SARS-CoV-2  
2 using RT-ddPCR. Samples from (A) were used for RT-ddPCR. 5  $\mu$ l of sample was used for RT-ddPCR in  
3 20  $\mu$ l reaction volume. The mean genome copies/ $\mu$ l of N1 & N2 were less than 1.2 in negative controls  
4 without virions added. N1 & N2 target SARS-CoV-2. cRPP30 is specific for *RPP30* cDNA, and RPP30  
5 targets both genomic DNA and cDNA. Copies/ $\mu$ l refers to concentration in the samples used for RT-  
6 ddPCR. The error bars represent Poisson 95% confidence intervals. Dashed line indicates the threshold  
7 for the low detection limit of 1.8 copies/ $\mu$ l of SARS-CoV-2 virions. NTC, no-template control.

8 **Figure 3.** SARS-CoV-2 detection of patient samples prepared by the Chelex method.

9 **(A)** Patient NP swab samples were heated in the presence of 5% Chelex (S01 to S16, and S19, S20) or  
10 10% Chelex (S17 & S18). S19 & S20 are 1:2 dilution of S17 & S18 in LowTE, respectively. **(B)** 50  $\mu$ l of  
11 patient saliva samples (Saliva01 & 02) or negative patient saliva samples spiked with positive patient  
12 saliva samples (Saliva03 to 22) were mixed with 25  $\mu$ l of 50% Chelex in TED99, and heated for 5 min in a  
13 ThermoMixer. **(C)** Paired NP swabs from seven patients (P1 to P7) and saliva-saturated swabs from four  
14 patients (P4 to P7) were collected in VTM or Chelex collection tubes. VTM samples were used for RNA  
15 extraction (EasyMag). Luna refers to the NEB Luna RT-qPCR kit and NEB-Luna-Program II with 2.5  $\mu$ l  
16 samples in a 10  $\mu$ l reaction volume. CL refers to CDC assay performed in the clinical laboratory with 5  $\mu$ l  
17 samples in a 20  $\mu$ l reaction volume. Undetermined Ct values were plotted as Ct 40.

18 **Figure 4.** Viral and cellular RNA stability in lowTE by RT-ddPCR assays. **(A)** Virions of  
19 1000 virion genome copies/ $\mu$ l and 100 cells/ $\mu$ l 293FT cells were prepared in lowTE, TED10 or MEM  $\alpha$ ,  
20 and stored at room temperature. Samples were heated with 5% Chelex on the time points indicated and  
21 assayed. The RT-ddPCR reactions were carried out in one well for N1 and cRPP30 and another well for  
22 N2 and RPP30. **(B)** Virions of 1000 virion genome copies/ $\mu$ l and 100 cells/ $\mu$ l 293FT cells were prepared  
23 in the buffers, heated with 5% Chelex on day 0, and assayed on a time series. Copies/ $\mu$ l refers to  
24 concentration in the samples used for RT-ddPCR. The error bars represent Poisson 95% confidence  
25 intervals.

26 **Figure 5.** Viral RT stability in saliva by RT-ddPCR assays. **(A)** Virions were added to saliva  
27 samples at 1000 virion genome copies/ $\mu$ l and stored at room temperature. Samples were heated with 1/5

1 volumes of 50% Chelex prepared in H<sub>2</sub>O or TED99 on the time points indicated and assayed. The RT-  
2 ddPCR reactions were carried out in one well for N1 and cRPP30 and another well for N2 and RPP30.  
3 **(B)** Virions of 1000 virion genome copies/μl were prepared in saliva as in (A), heated with Chelex on day  
4 0 or day 3, and assayed on the days indicated. cRPP30 data points were not plotted because of the low  
5 level detected. Copies/μl refers to concentration in the samples used for RT-ddPCR. The error bars  
6 represent Poisson 95% confidence intervals.

7 **Figure S1.** DMSO decreases negative droplet intensity in RT-ddPCR assays. The RT-  
8 ddPCR reactions containing 0%, 2.5%, or 5% DMSO were performed for a Chelex-lowTE sample  
9 prepared with the ATCC SARS-CoV-2 virions and 293FT cells using N1 and cRPP30 (left panel) or N2  
10 and RPP30 (right panel). The grey clusters represent negative droplets; blue and green clusters  
11 represent Fam and Hex positive droplets, respectively; and orange clusters represent double positive  
12 droplets.

13 **Figure S2.** SARS-CoV-2 prepared in different buffers used for RT-qPCR without RNA-  
14 extraction. **(A)** Samples were diluted in H<sub>2</sub>O as indicated at the bottom. Expected\_Ct refers to Ct  
15 calculated based on Ct from extracted RNA normalized with added virion numbers after dilution using the  
16 ΔCt method. **(B)** Buffer compatibility in RT-qPCR. Sample RNA, not heated and 5 μl of which contained  
17 materials extracted from 6,250 virions. Other samples were heated in the presence of Chelex, of which  
18 undiluted samples also contained 6,250 virions per 5 μl. Samples were diluted in H<sub>2</sub>O. Samples with  
19 undetermined Ct values were plotted as Ct 40. The NEB Luna RT-qPCR kit and NEB-Luna-Program I  
20 was used. NTC, no-template control.

21 **Figure S3.** Tris EDTA and DMSO containing buffers. **(A)** RT-qPCR of samples with heat-  
22 inactivated ATCC SARS-CoV-2 virions. 5 μl of samples were used for one reaction in RT-qPCR except  
23 that samples in MEM α were diluted 1:1 with H<sub>2</sub>O. Samples with undetermined Ct values were plotted as  
24 Ct 40. The NEB Luna RT-qPCR kit and NEB-Luna-Program I was used. **(B)** RT-ddPCR of saliva samples  
25 with heat-inactivated ATCC SARS-CoV-2 virions. The Chelex was prepared in H<sub>2</sub>O, lowTE or TED99



1 (lowTE with 99% DMSO). RNA-kit refers to RNA extracted with the RNeasy Protect Saliva Mini Kit. NTC,  
2 no-template control.

3 **Figure S4.** Optimization of the NEB Luna RT-qPCR assay. Extracted RNA samples were  
4 serial diluted and assayed either using 2.5  $\mu$ l sample in a 10 reaction volume or 5  $\mu$ l in a 20  $\mu$ l reaction,  
5 and using a longer PCR protocol (I: 10 seconds of denature and 40 seconds of annealing/extension) or a  
6 shorter PCR protocol (II: 5 seconds of denature and 20 seconds of annealing/extension). NTC, no-  
7 template control.

**Figure 1**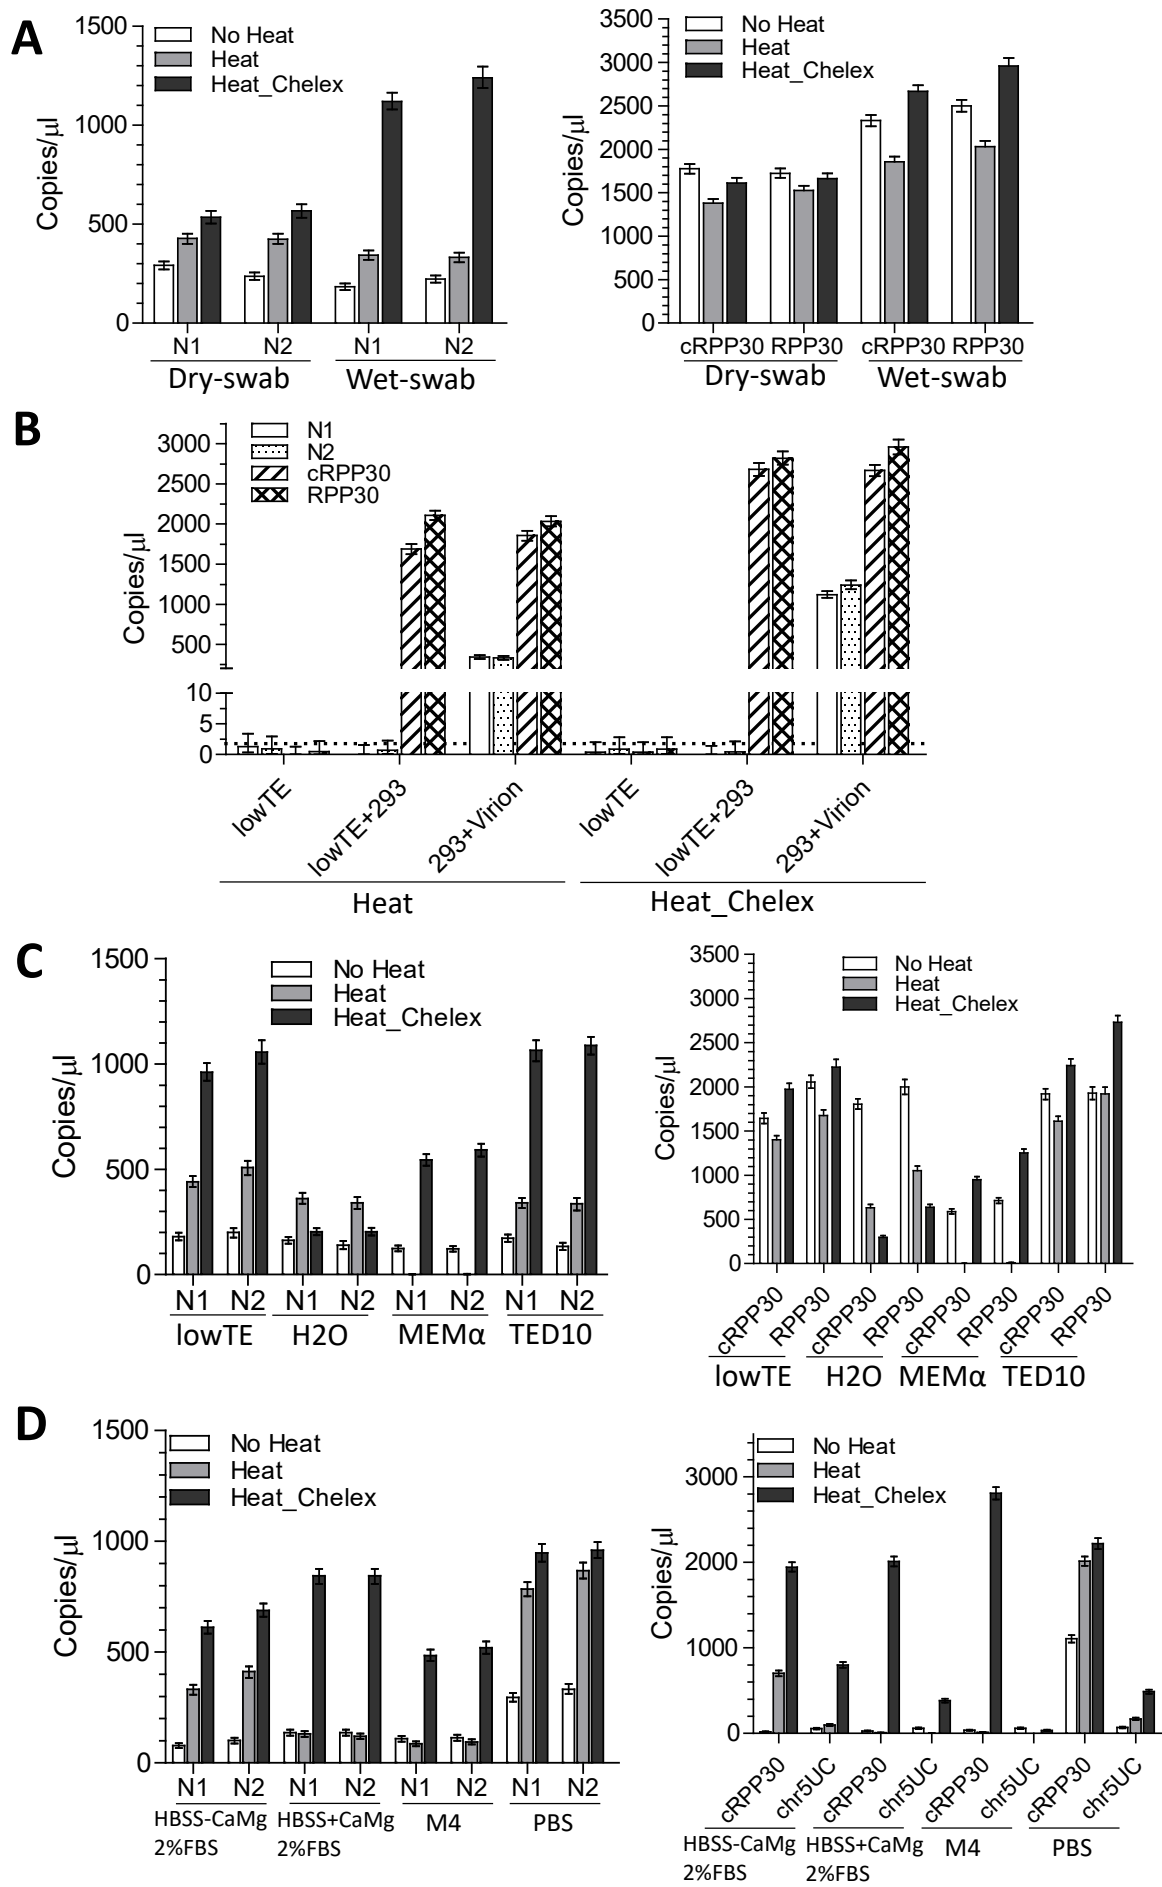

**Figure 2**

**A**

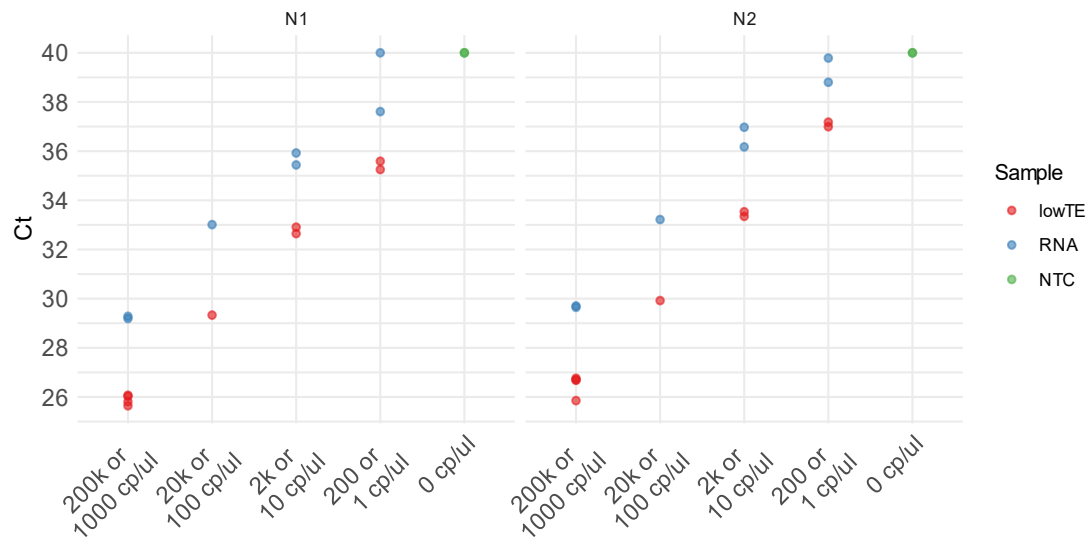

**B**

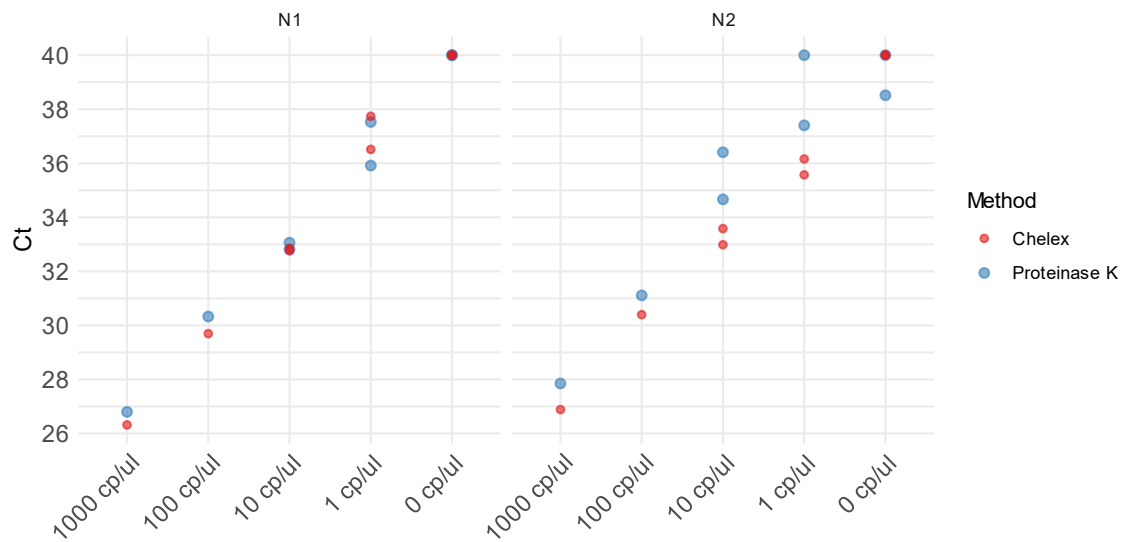

**C**

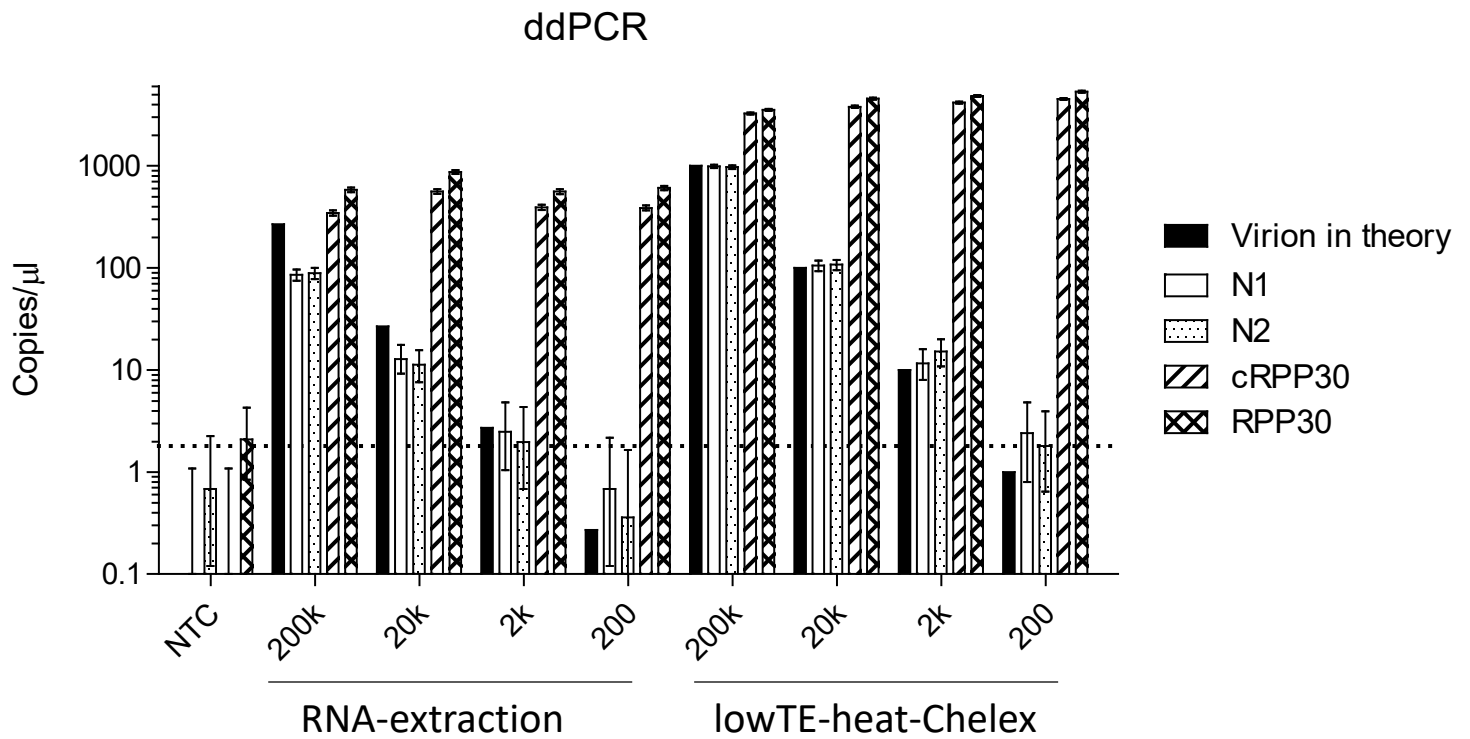

**Figure 3**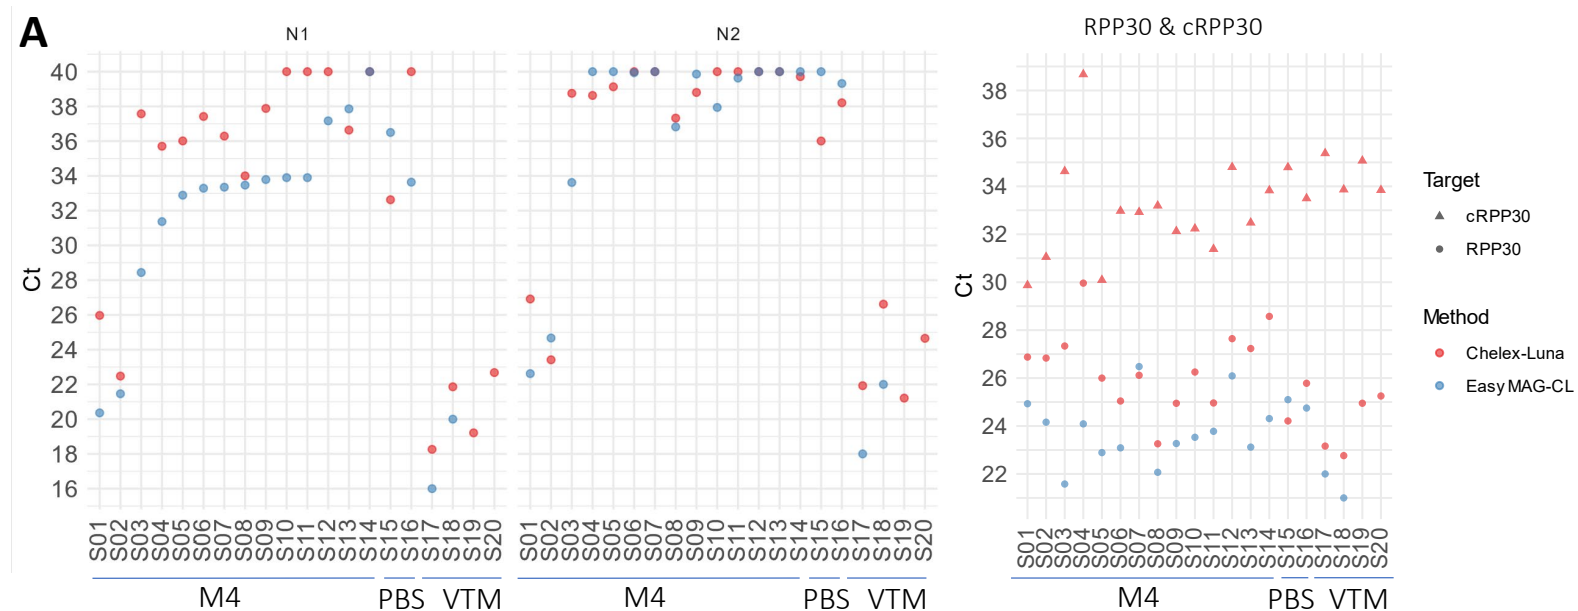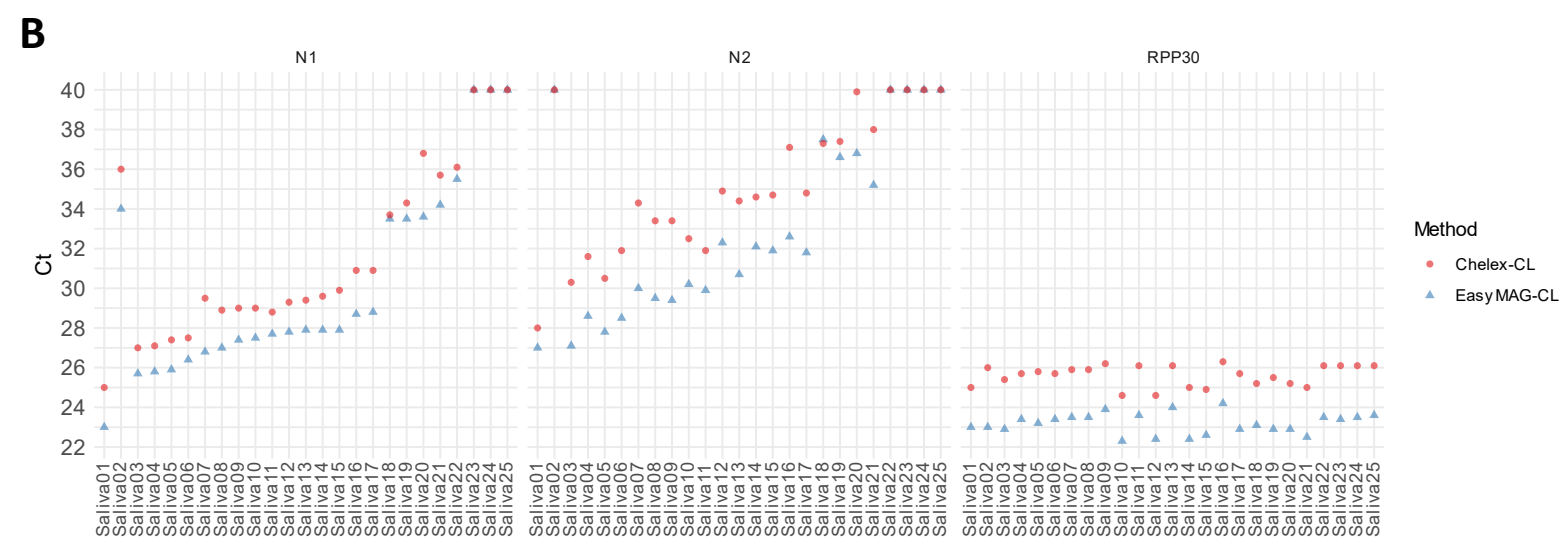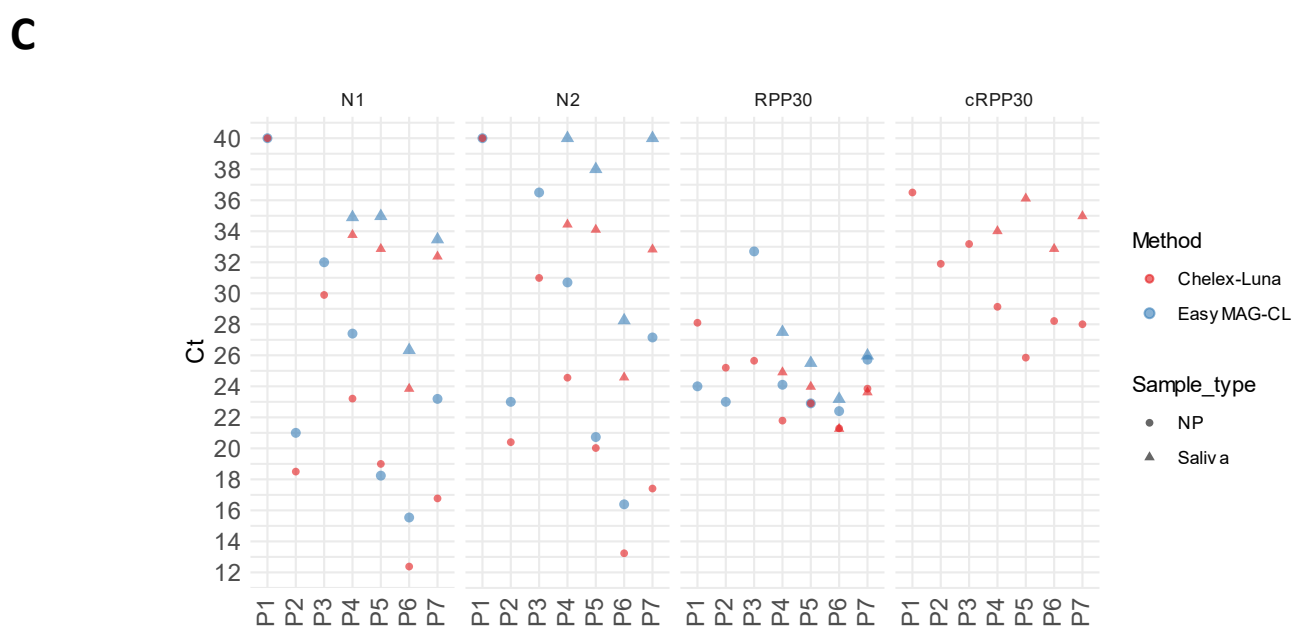

Figure 4

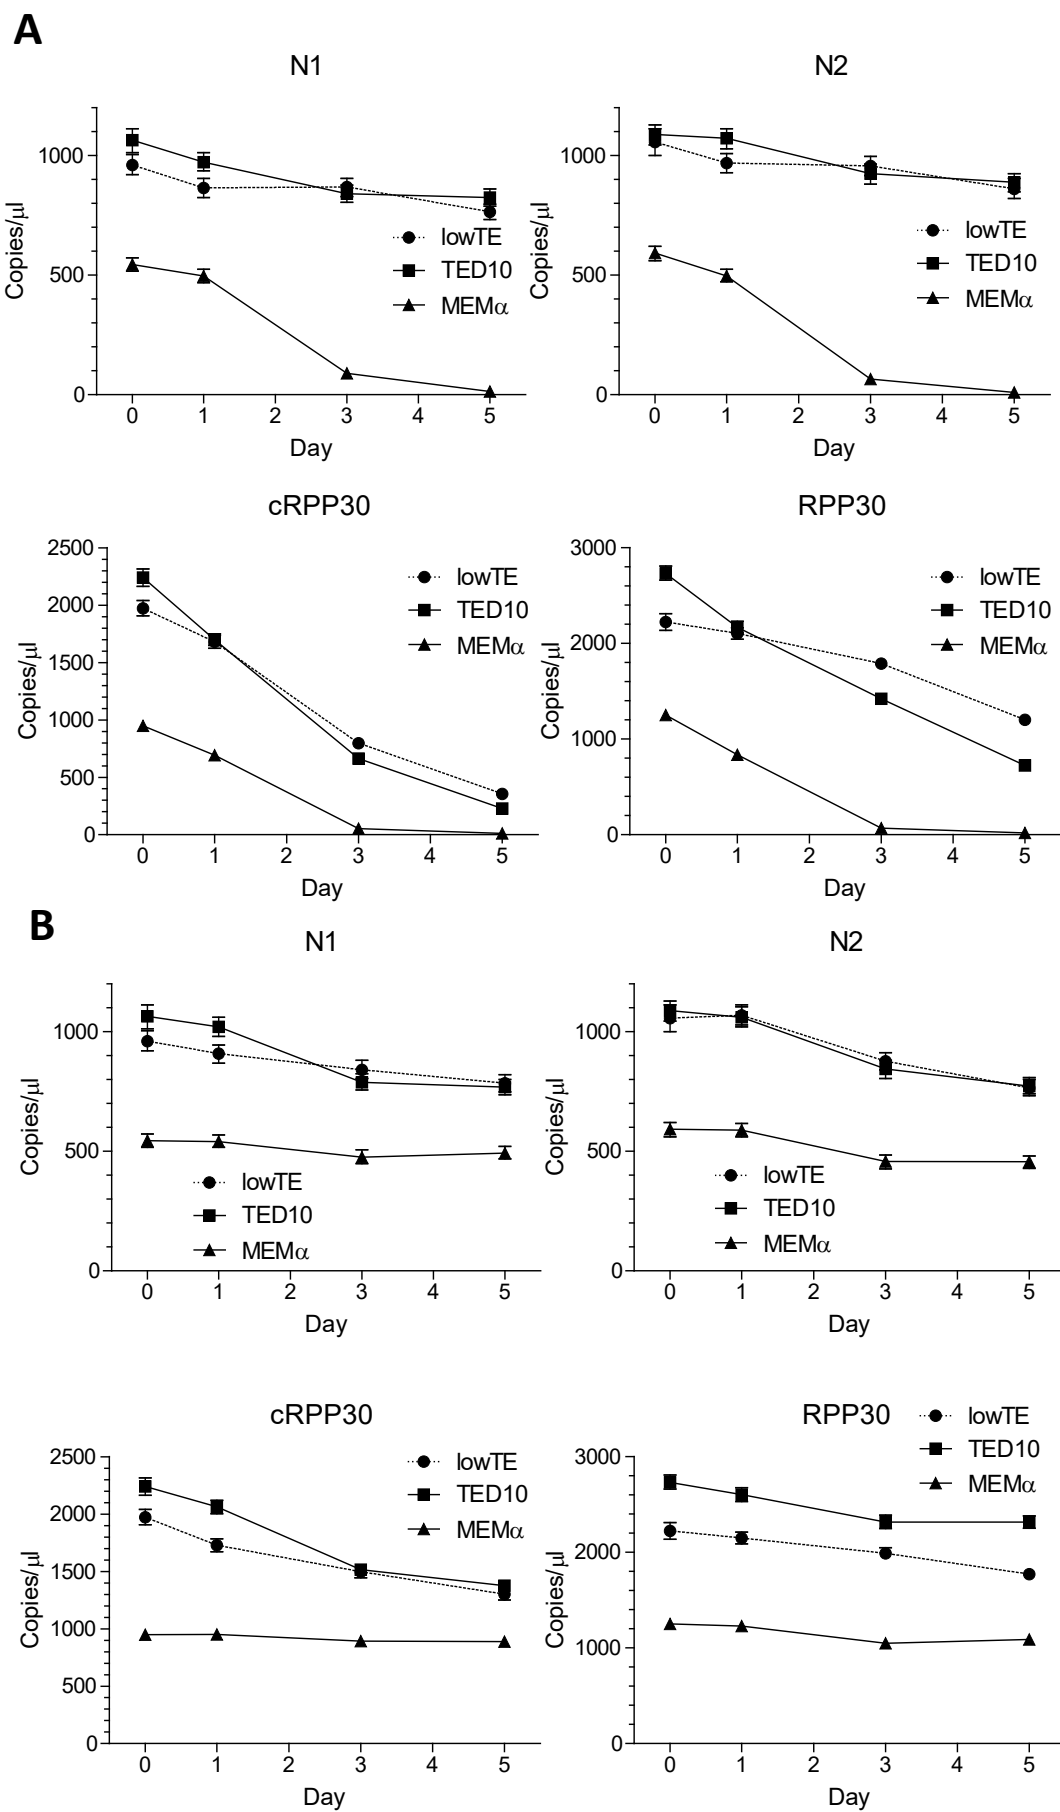

**Figure 5**

**A**

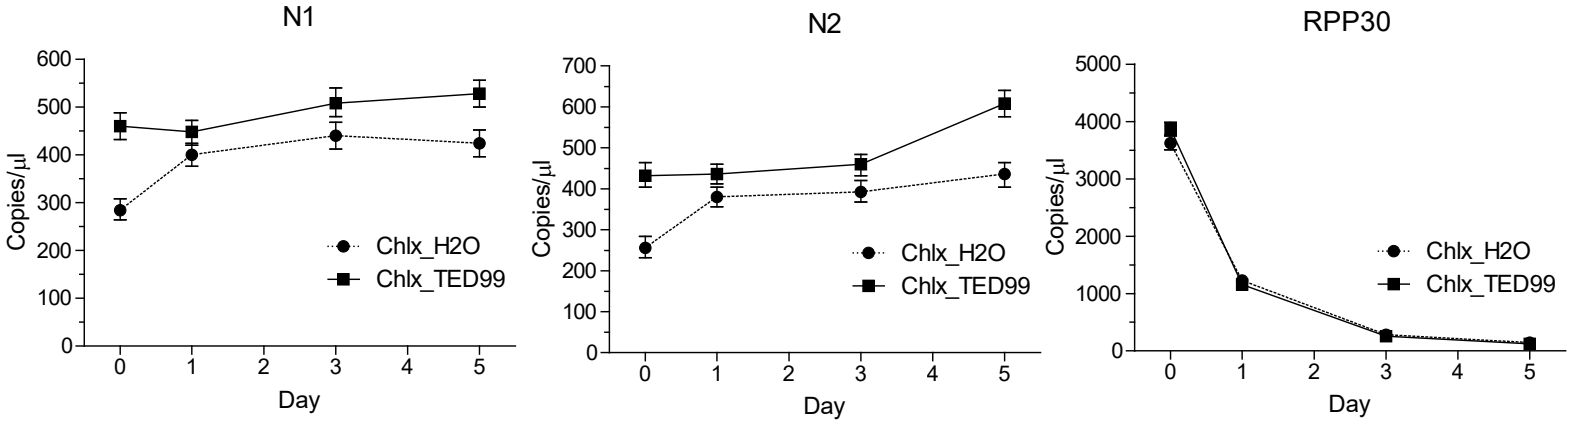

**B**

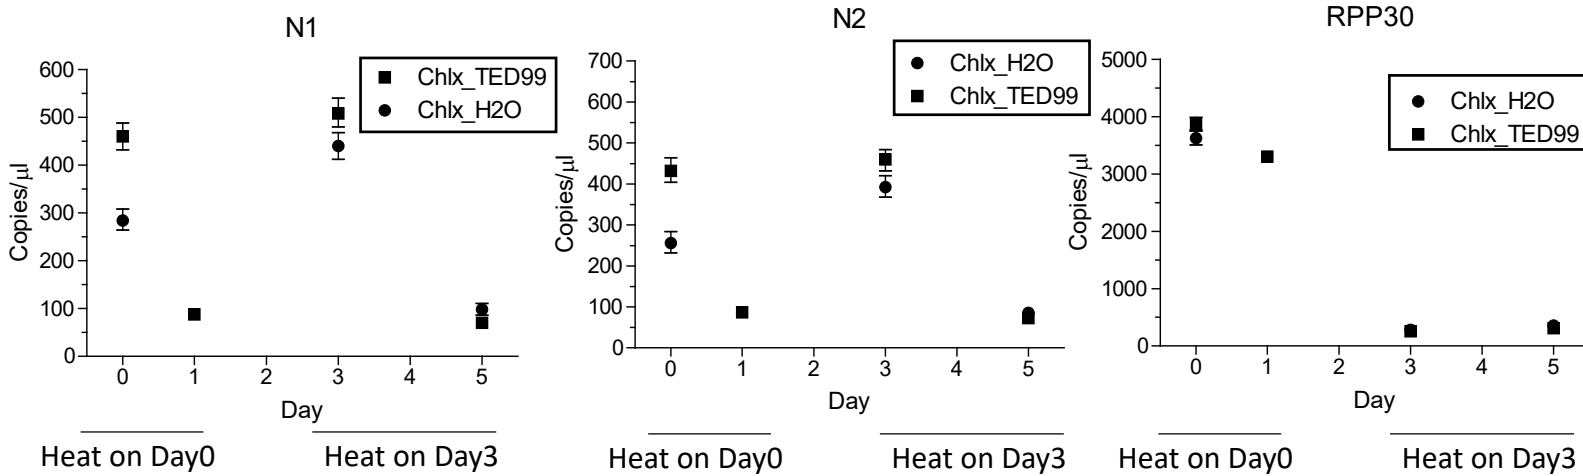

Figure S1

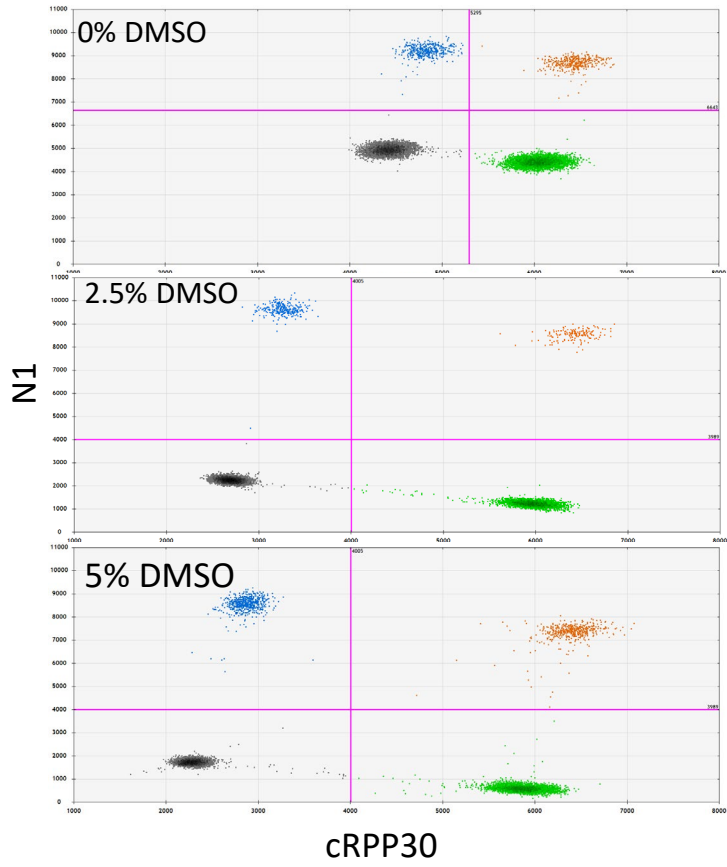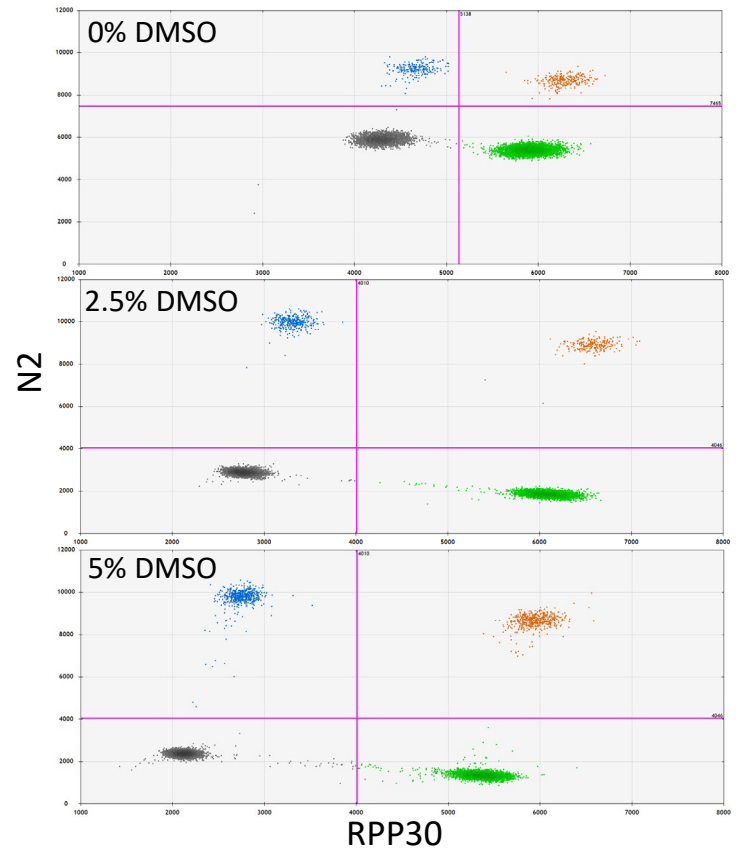

**Figure S2**

**A**

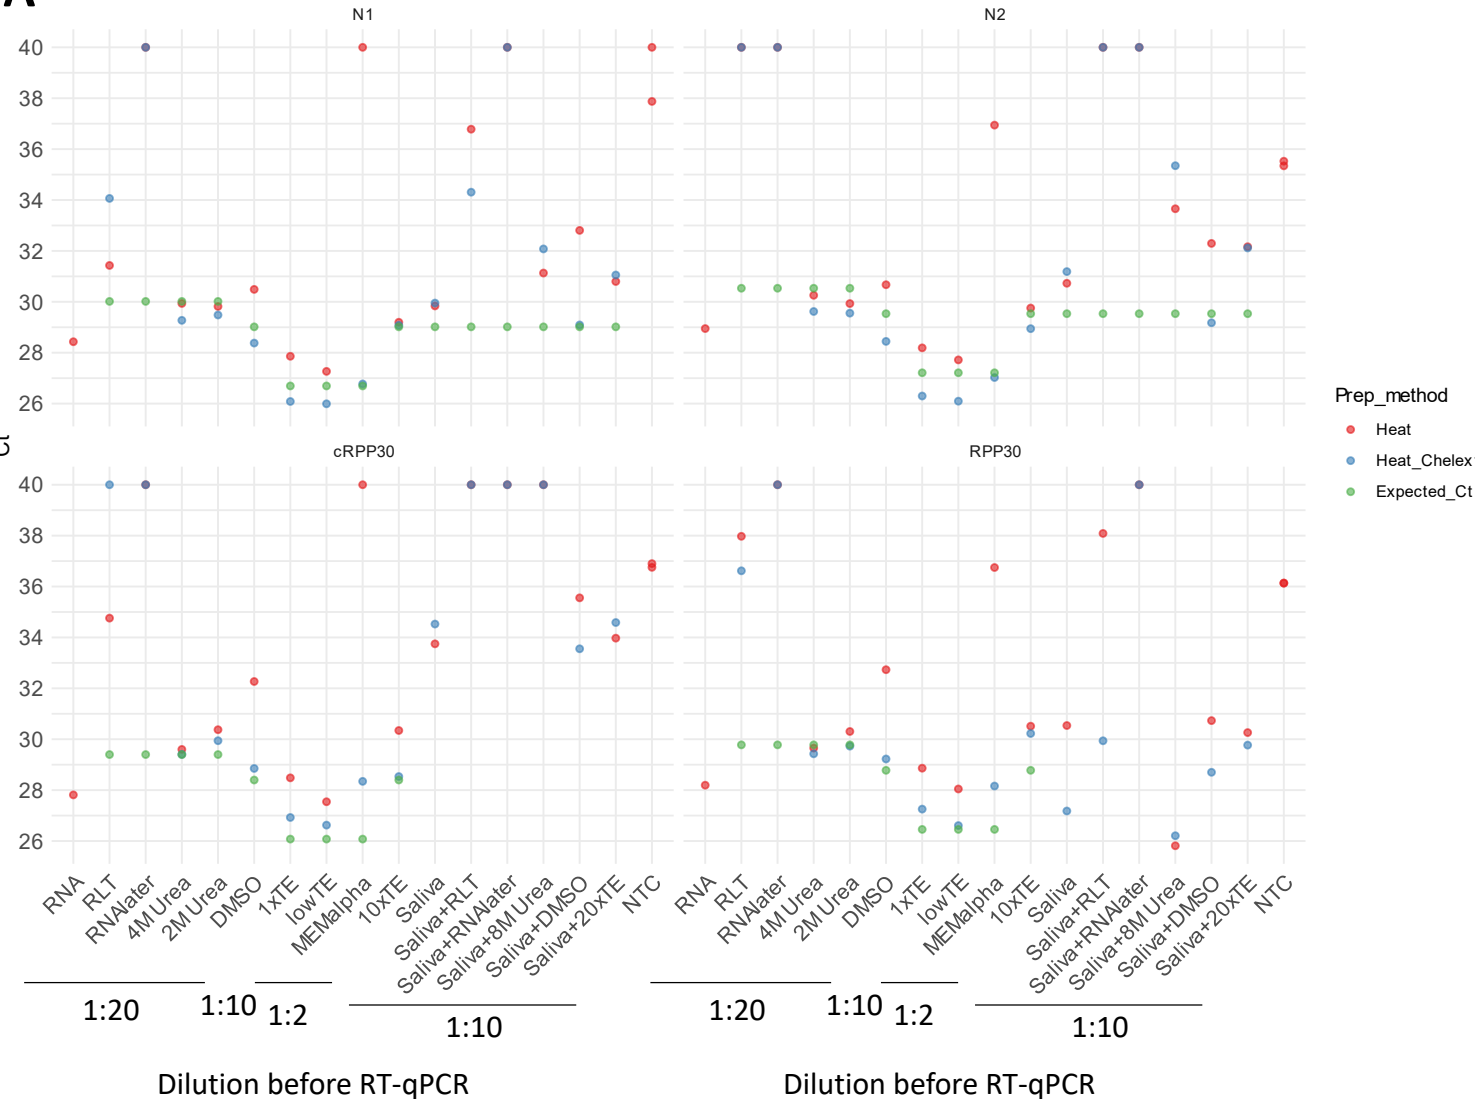

**B**

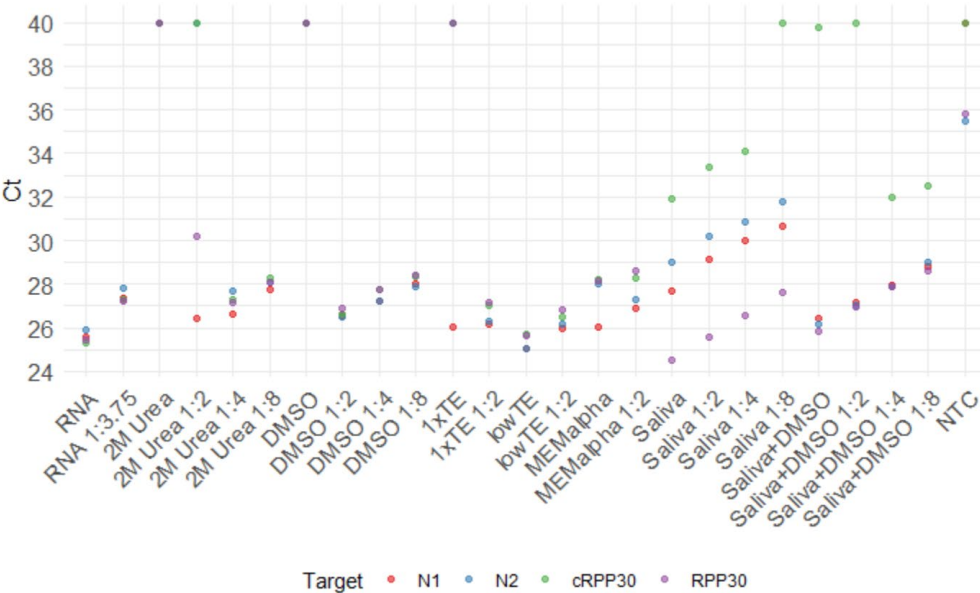



**Figure S3**

**A**

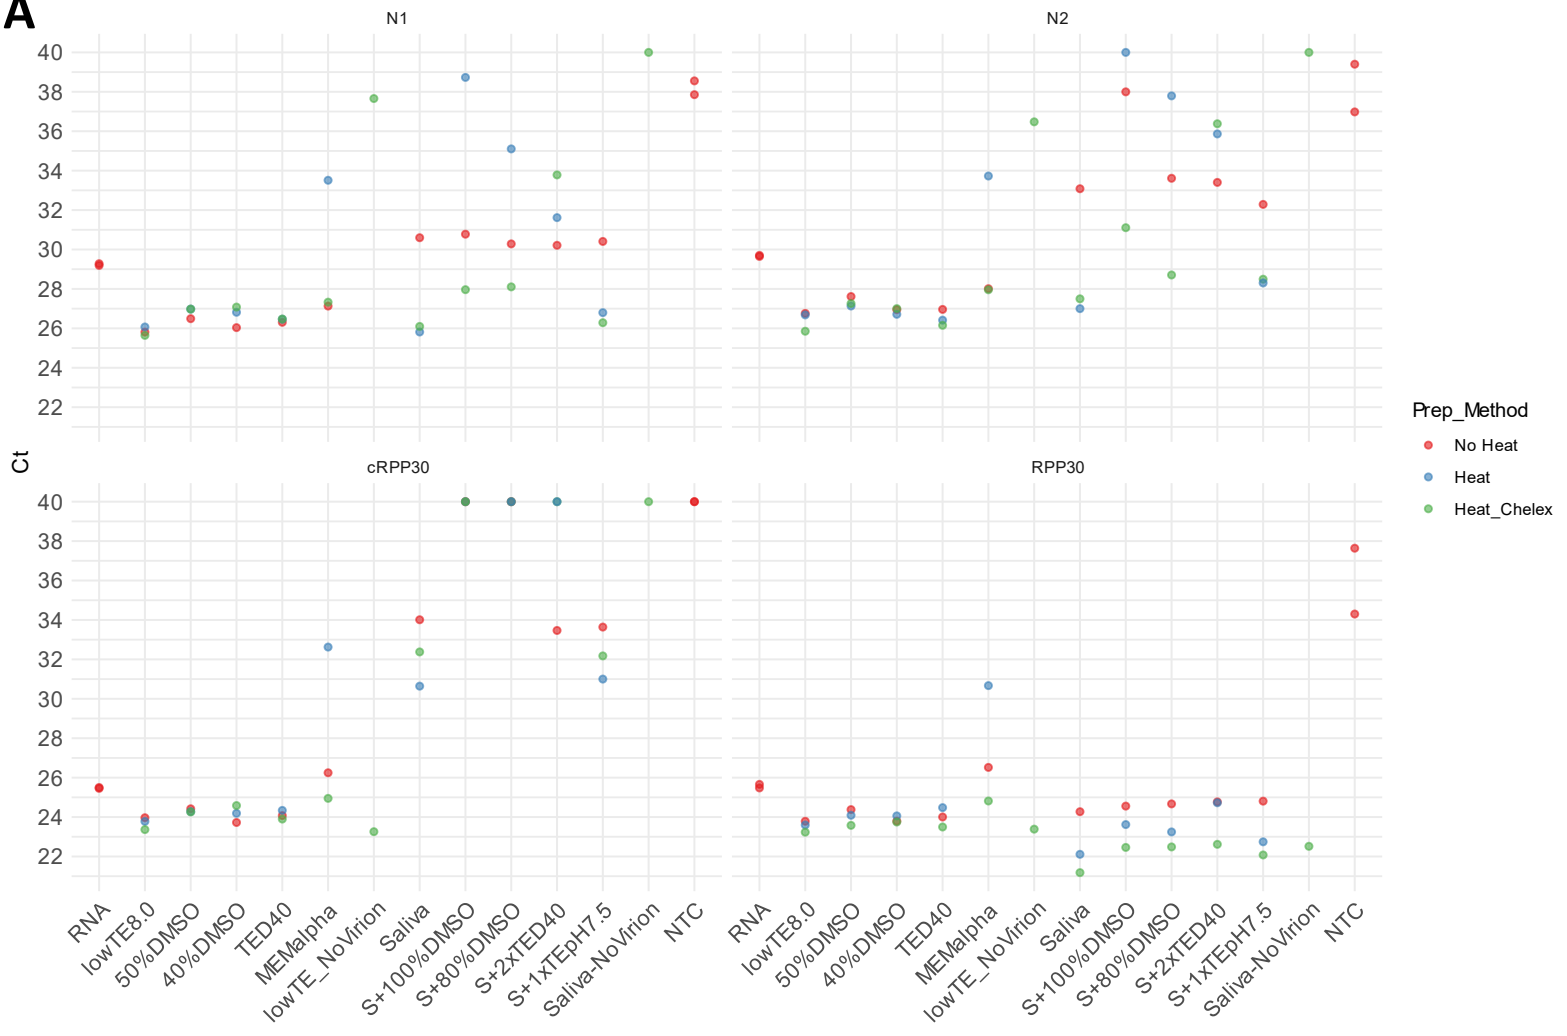

**B**

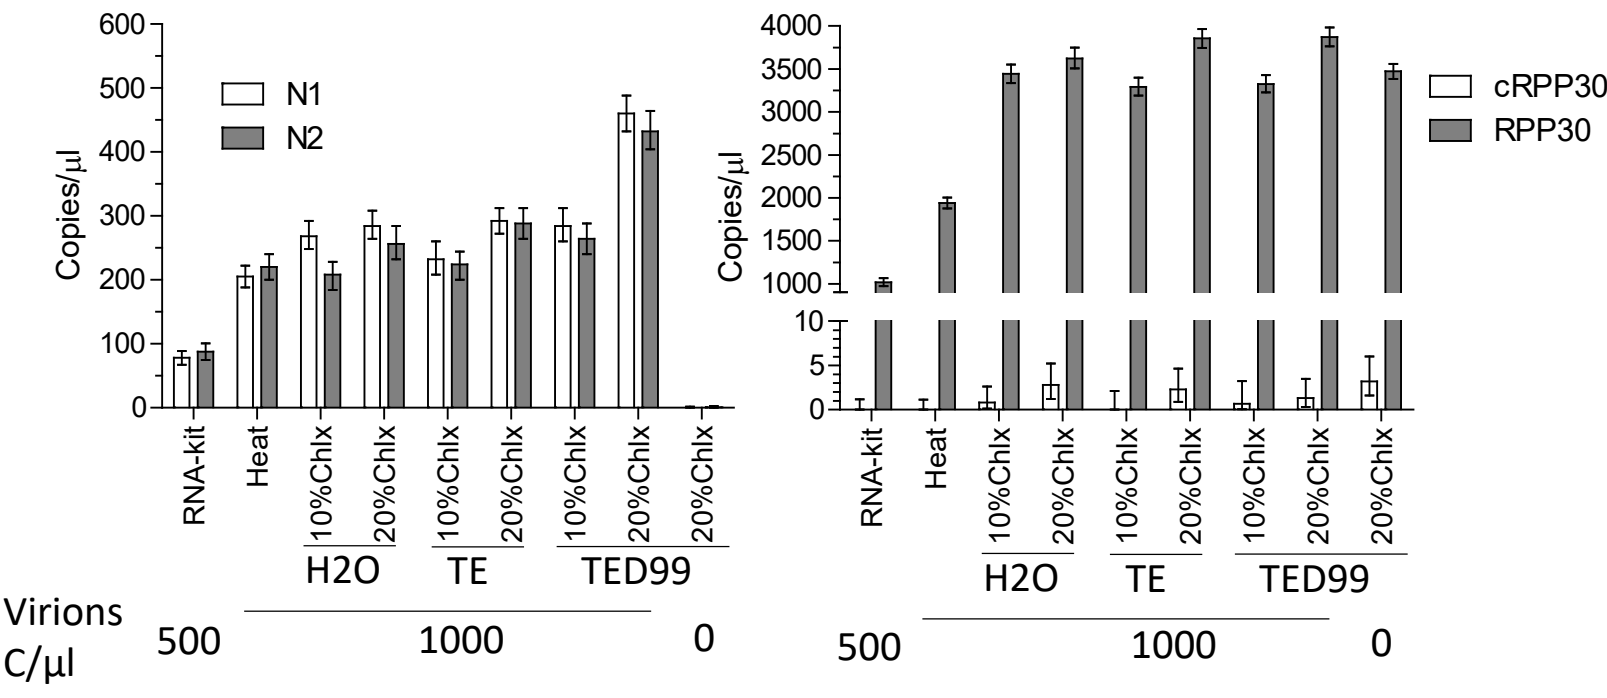

Figure S4

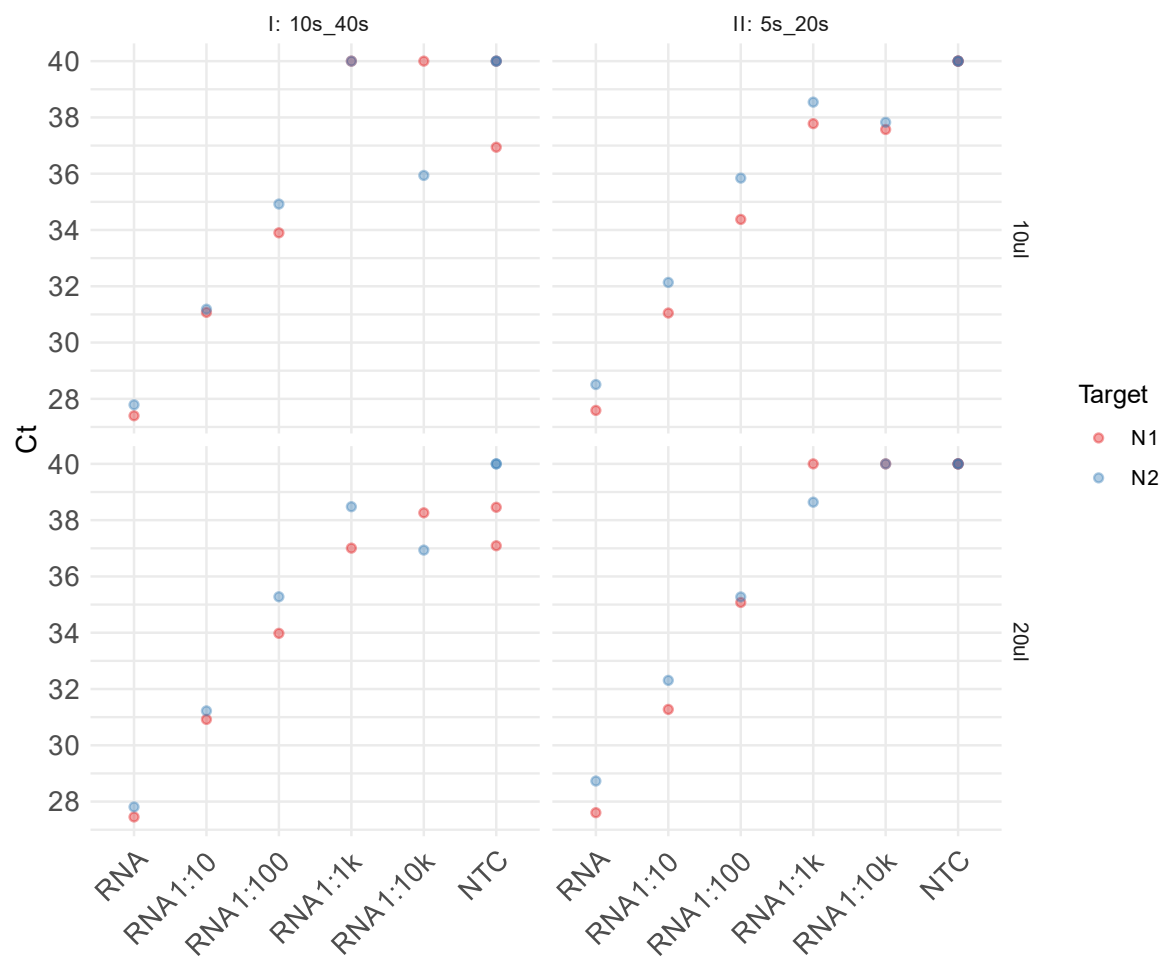

Source: https://medrxiv.org/content/10.1101/2021.01.29.21250790v1.full.pdf
